1     **Type-I interferons inhibit interleukin-10 signaling and favor type 1 diabetes**  
2                                     **development in NOD mice.**

3  
4     Marcos Iglesias<sup>a</sup>, Anirudh Arun<sup>a</sup>, Maria Chicco<sup>a</sup>, Brandon Lam<sup>a</sup>, Conover Talbot<sup>b</sup>, Vera  
5             Ivanova<sup>a</sup>, W.P. A Lee<sup>a</sup>, Gerald Brandacher<sup>a</sup>, and Giorgio Raimondi<sup>a\*</sup>

6  
7     <sup>a</sup>Vascularized and Composite Allotransplantation Laboratory, Department of Plastic and  
8             Reconstructive Surgery, Johns Hopkins School of Medicine, Baltimore, MD, USA.

9     <sup>b</sup>Institute for Basic Biomedical Sciences, Johns Hopkins School of Medicine, Baltimore, MD,  
10                                     USA.

11  
12  
13     **Correspondence:** Dr. Giorgio Raimondi, Vascularized and Composite Allotransplantation  
14     Laboratory, Ross Research Building, Room 755A. Department of Plastic and Reconstructive  
15             Surgery Johns Hopkins School of Medicine, Baltimore, MD, USA.

16                                     Phone: (443) 287-4909; Fax: (410) 955-9308  
17                                     e-mail: [g.raimondi@jhmi.edu](mailto:g.raimondi@jhmi.edu)

18  
19

1

## 2 **Abstract**

3 Destruction of insulin-producing  $\beta$ -cells by autoreactive T lymphocytes leads to the development  
4 of type 1 diabetes. Type I interferons (TI-IFN) and interleukin-10 (IL-10) have been connected  
5 with the pathophysiology of this disease; however, their interplay in the modulation of  
6 diabetogenic T cells remains unknown. We have discovered that TI-IFN cause a selective  
7 inhibition of IL-10 signaling in effector and regulatory T cells, altering their responses. This  
8 correlates with diabetes development in NOD mice, where the inhibition is also spatially  
9 localized to T cells of pancreatic and mesenteric lymph nodes. IL-10 signaling inhibition is  
10 reversible and can be restored via blockade of TI-IFN/IFN-R interaction, paralleling with the  
11 resulting delay in diabetes onset and reduced severity. Overall, we propose a novel molecular  
12 link between TI-IFN and IL-10 signaling that helps better understand the complex dynamics of  
13 autoimmune diabetes development and reveals new strategies of intervention.

14

## 15 **Keywords**

16 Type-I Interferons; Interleukine-10 Signaling; T lymphocytes; Type 1 Diabetes; NOD mice

17

## 18 **Abbreviations**

19 ALN, axillary lymph nodes; IL-10, interleukin-10; MFI, mean fluorescence intensity; MLN,  
20 mesenteric lymph nodes; NOD, nonobese diabetic mice; PLN, pancreatic lymph nodes; TI-IFN,  
21 type-1 Interferons; Tmem, memory T cells; Treg, regulatory T cells.

22

## 1        **1. Introduction**

2            Type 1 Diabetes is a complex autoimmune disease characterized by the progressive  
3        destruction of the insulin-producing  $\beta$ -cells in the pancreas by autoreactive T lymphocytes [1]. It  
4        is caused by a combination of genetic predisposition and environmental factors. In the past  
5        decade, viral infections and the composition of the gut microbiota have gained increasing  
6        attention as environmental factors that contribute to the initiation of the disease[2-4] but the  
7        mechanisms by which these factors contribute to the activity of diabetogenic T cells remains  
8        unknown. It is clear that CD4 T cells are of chief importance in this disease. Nonobese diabetic  
9        (NOD) mice, a widely used model of human T1D that spontaneously develop diabetes, are  
10       protected from the disease onset when deficient in CD4 T cells [5, 6] and enriched CD4<sup>+</sup> cells  
11       from diabetic donors are able to transfer the disease when administered into NOD-scid/scid  
12       recipients [7]. However, the connection between environment and the activity of diabetogenic T  
13       cells remains elusive.

14           Multiple clinical and experimental observations point toward type-I interferons (TI-IFN),  
15        essential cytokines for the clearance of viruses, as the mediators that drive a pre-diabetic or  
16        susceptible individual toward type 1 diabetes [8]. Relevant examples include: high levels of IFN-  
17         $\alpha$  detected in the pancreas of diabetic patients [9], absence of autoantibodies able to neutralize  
18        IFN- $\alpha$  in the subset of AIRE-deficient (APS1) patients that developed diabetes [10], induction of  
19        diabetes in non-autoimmune prone C57BL/6 mice by overexpression of IFN- $\alpha$  in  $\beta$ -cells [11],  
20        accumulation of high levels of TI-IFN in NOD mice [12], and delay of disease onset (and  
21        decreased incidence) with early blockade of TI-IFN receptor signaling [13]. More recently,  
22        Ferreira and colleagues reported that an IFN signature in PBMC of genetically predisposed  
23        children was detectable before the appearance of islet-specific autoantibodies [14]. Despite these

1 observations, the mechanism(s) through which TI-IFN promotes T1D remains poorly  
2 understood.

3

4 The cytokine IL-10 has an essential role in the development of autoimmune pathologies.[15]  
5 Previous studies suggested that the low expression of this cytokine in the pancreas mediates the  
6 occurrence of diabetes [16] and decreased IL-10 levels in serum of newly diagnosed children  
7 with type 1 diabetes has been observed [17]. Monocytes/macrophages have been historically  
8 investigated as the main target of this cytokine [18]; however, IL-10 acts also directly on T cells.  
9 This has been shown in the context of naïve T cells activation and differentiation [19, 20], in the  
10 regulation of effector and memory T cells [21-23] and in the preservation of regulatory T cell  
11 function [24, 25].

12 Here we report a novel effect of TI-IFN that causes a selective inhibition of IL-10  
13 signaling in T cells thereby reducing their capacity to be regulated. This loss of signaling  
14 correlates with the development of the disease in NOD mice. This effect is sustained but  
15 compartmentalized, manifesting only in T cells of pancreatic (PLN) and mesenteric (MLN)  
16 lymph nodes of NOD mice, suggesting a link with the response to the gastric environment in  
17 these animals. Importantly, IL-10 signaling in T cells could be partially restored via blockade of  
18 TI-IFN signaling, supporting earlier observations on the beneficial effects of transient TI-IFN  
19 blockade in NOD mice [13]. Overall, our results reveal a new molecular mechanism involved in  
20 the causative process of type 1 diabetes and suggest novel targets for prevention and treatment of  
21 T1D.

22

## 1        2. Results

### 2        2.1 Localized defective IL-10 signaling in memory and regulatory CD4 T cells in TI-IFN 3        enriched tissues.

4        Li et al. reported unexpectedly high levels of IFN $\alpha$  production in the PLN of NOD mice starting  
5        in the 2<sup>nd</sup> week of life that correlated with the presence of CD4 T cells with a transcriptional  
6        signature abundant in INF-induced genes [13]. Based on the suspected involvement of IL-10 in  
7        disease development, we tested if these TI-IFN-exposed T cells would show any alteration in  
8        their response to IL-10. To evaluate signal integrity, we quantified the accumulation of the  
9        phosphorylated (active) form of the transcription factor STAT3 (P-STAT3, a key molecule in the  
10        IL-10 signaling pathway) in response to *ex vivo* stimulation with IL-10. The response to the pro-  
11        inflammatory cytokine IL-6 (that also induces phosphorylation of STAT3) was measured to  
12        distinguish between cytokine-specific Vs nonspecific effects of TI-IFN exposure. We compared  
13        multiple CD4 T cell subsets: naïve (CD4<sup>+</sup>CD44<sup>low</sup>Foxp3<sup>-</sup>), memory (CD4<sup>+</sup>Foxp3<sup>-</sup>CD44<sup>hi</sup>) and  
14        regulatory (CD4<sup>+</sup>Foxp3<sup>+</sup>) T cells residing in PLN, MLN, axillary lymph nodes (ALN), and  
15        spleen (each separately), in 4-week-old NOD mice (the reported time of highest accumulation of  
16        IFN $\alpha$ ; [13]). Independent repeats of these measurements indicated a statistically significant  
17        reduction in IL-10 signaling in both Tmem and Treg from PLN and MLN compared to the  
18        response of the same T cell subsets in the spleen (**Fig. 1A&B**) and ALN (not shown). In 4-week-  
19        old non-diabetes prone B6 mice, which do not accumulate TI-IFN in pancreatic and mesenteric  
20        lymph nodes, Tmem and Treg preserved their ability to fully respond to IL-10 in all lymphoid  
21        tissues (**Fig. 1A&C**). Importantly, this decrement in STAT3 phosphorylation was specific to IL-  
22        10 signaling, as the response to IL-6 was unaltered in the T cells of NOD (and B6) mice from all  
23        the lymphoid tissues tested (**Fig.1C**). Together, these results suggested that in NOD mice there is

1 a selective reprogramming of the signaling for IL-10, actuated specifically in lymphoid tissues  
2 shown to accumulate TI-IFN [13].

3

## 4 **2.2 The impact of TI-IFN on IL-10 signaling is not a genetic characteristic of NOD T cells.**

5 We then tested if this effect was unique to T cells of NOD background, or if bystander exposure  
6 of any T cells to unusual levels of TI-IFN could affect their ability to be controlled by IL-10.

7 Bulk T cells from wt B6 mice were exposed to IFN- $\beta$  (or IFN- $\alpha$ ) for 48 hours, and then the  
8 levels of P-STAT3 induced by stimulation with IL-10 or IL-6 were quantified via Phospho-flow.

9 Exposure to IFN- $\beta$  (and similarly to IFN- $\alpha$ , not shown) induced a statistically significant  
10 reduction of STAT3 phosphorylation after IL-10 stimulation in Tmem and Treg cells when  
11 compared to the response in fresh or mock-treated cells (cultured without IFN- $\beta$ , to exclude any  
12 impact from the culturing conditions) (**Fig. 2A&B**). Reduction of IL-10 signaling responses were  
13 dose-dependent upon IFN- $\beta$  levels, reaching maximum inhibition at 5 ng/ml of IFN-  
14  $\beta$  (Supplementary Fig. 1). As observed in T cells from NOD mice, the levels of P-STAT3 in  
15 response to IL-6 stimulation remained unaltered under all conditions (**Fig. 2C**), confirming that  
16 this effect was not a generalized saturation of the Jak/STAT signaling pathway.

17

## 18 **2.3 IFN- $\beta$ -mediated inhibition of IL-10 signaling alters induction of IL-10 responsive genes**

19 A deeper evaluation of the functional impact that inhibition of IL-10 signaling by TI-IFN has on  
20 the modulation of T cells can be done via assessment of its transcriptional impact. However, the  
21 transcriptional impact of IL-10 on T cells is unknown. We therefore harnessed the vast  
22 knowledge about IL-10 signaling in antigen presenting cells. Taking advantage of data from the  
23 most recent publicly available RNAseq analysis of mouse macrophages exposed to IL-10 [26],

1 we selected a pool of 29 genes highly upregulated ( $> 6\sigma$ ) (Supplementary Fig. 2A) as initial lead  
2 for genes that could be also induced in T cells. Ten of these upregulated genes had known  
3 functions in T cells (Supplementary Fig. 2B). We then tested the expression of these genes as a  
4 screening panel for further investigation of Treg and Tmem cells responses to IL-10 with or  
5 without TI-IFN pre-exposure. To obtain a sufficient and homogeneous number of Tmem, we  
6 implemented the previously published “parking method” (Methods) where in vitro-activated T  
7 cells are “parked” in congenic Rag<sup>-/-</sup> mice to generate Tmem [27]. Treg cells were freshly-  
8 isolated from unmanipulated animals. Gene transcription analysis showed four genes –*LIGHT*,  
9 *Sphk1*, *Tarm1* and *2B4* – to be significantly upregulated in Tmem by in vitro treatment with IL-  
10 10 (**Fig. 3A**), and two genes, *Sphk1* and *2B4*, were upregulated in Treg (**Fig. 3B**). We then  
11 analyzed if the induction of these genes was affected by pre-exposure of these cells in vitro to  
12 IFN- $\beta$ . In Tmem, the increased expression of *LIGHT*, *Sphk1*, *Tarm1* and *2B4* was completely  
13 abrogated (**Fig. 3A**). mRNA levels of *Sphk1*, *LIGHT* and *Tarm1* also showed an important  
14 decrease in IFN- $\beta$  exposed Treg, while the expression of *2B4* was not affected (**Fig. 3B**). These  
15 results indicate that the selective inhibition of STAT3 phosphorylation induced by INF- $\beta$  pre-  
16 exposure alters significantly the impact of IL-10-mediated transcription in Tmem and Treg cells.  
17

#### 18 **2.4 Inhibition of IL-10 signaling requires prolonged exposure to IFN- $\beta$ , but it is reversible**

19 To explore what length of exposure to IFN- $\beta$  is required to impact IL-10 signaling in T cells, wt  
20 B6 bulk T cells were exposed to IFN- $\beta$  for different lengths of time and the response to IL-10  
21 and IL-6 in different subsets assessed by Phospho-Flow. In Tmem cells, a 24-hour exposure  
22 significantly reduced the levels of IL-10-induced P-STAT3, but a 48-hour exposure was

1 necessary to achieve maximal inhibition (**Fig. 4A**). In Treg cells, a 24-hour exposure was  
2 sufficient to achieve the maximal inhibition of IL-10-induced P-STAT3 signaling (**Fig. 4A**).  
3 We also tested the reversibility of this inhibition. To address this question, after 48 hours of  
4 exposure to IFN- $\beta$ , T cells were washed, rested in cytokine-free media for 24 or 48 hours and the  
5 P-STAT3 response to IL-10 or IL-6 was then measured. Within 24 hours of removing IFN- $\beta$ ,  
6 Treg recovered their normal P-STAT3 response to IL-10 (**Fig. 4B**). The recovery of Tmem was  
7 slower, showing only partial restoration of the IL-10 signaling even at 48 hours after removing  
8 the IFN $\beta$  (**Fig. 4B**). These results indicate that the bystander effect of IFN- $\beta$  requires a prolonged  
9 exposure to instigate inhibition of IL-10 signaling and, with some kinetic differences between  
10 Treg and Tmem, a normal P-STAT3 response to IL-10 in T cells can be restored following  
11 removal of IFN- $\beta$ .

12

### 13 **2.5 IFN- $\beta$ signals through the Jak/STAT pathway to inhibit IL-10 signaling in T cells**

14 TI-IFNs signal through multiple pathways [28], with the activation of the Jak/STAT route  
15 considered the most relevant to their antiviral effects. To identify the signaling pathway  
16 responsible for the actuation of IFN- $\beta$  induced perturbations of IL-10 signaling, cells were pre-  
17 treated with two small molecule Jak-specific inhibitors, Tofacitinib and Ruxolitinib, prior to and  
18 during IFN- $\beta$  stimulation. Tofacitinib inhibits Jak3 and Jak1, while Ruxolitinib blocks Jak2 and  
19 Jak1. After preconditioning bulk T cells with Tofacitinib (25  $\mu$ M) or Ruxolitinib (5  $\mu$ M) for 2  
20 hours, IFN- $\beta$  was added to the cultures for 48 hours. Following incubation and washing, an  
21 additional 6-8 hours resting phase allowed the cells to recover their signaling after removal of the  
22 Jak inhibitor (Supplementary Fig. 3). The impact on IL-10 or IL-6 signaling was then quantified  
23 via phospho-flow. In Tmem, Tofacitinib treatment resulted in a statistically significant



1 preservation of IL-10 signaling and Ruxolitinib had an even stronger effect (**Fig. 5A**). In Treg,  
2 both inhibitors restored IL-10 signaling to the same extent (Fig. 5A), though the cells had to be  
3 rested for 8 hours (instead of 6 hours as in the case of Tmem), as their recovery of cytokines  
4 signaling after Jak inhibition was slower than in Tmem. Collectively, these results suggest that  
5 Jak1, and possibly Jak2, are essential mediators for IFN- $\beta$ -mediated alterations of IL-10-induced  
6 P-STAT3 signaling in T cells.

7 Our data indicate that TI-IFN causes inhibition of IL-10 signaling through a process that requires  
8 24/48 hours of exposure. This suggests that multiple intracellular molecular modifications are  
9 needed to achieve this phenotype and the process could require the synthesis and activity of  
10 additional extracellular mediators. To test this hypothesis, we employed a co-culture system with  
11 T cells deficient for the receptor of TI-IFN (IFN-AR1<sup>-/-</sup>; unable to respond to IFN- $\alpha$  or - $\beta$ ).  
12 These cells have a response to IL-10 comparable to that displayed by wild type cells  
13 (Supplementary Fig. 4). We then exposed B6 wild type congenic T cells (CD45.1<sup>+</sup> from B6/SJL  
14 mice) mixed at 1:1 ratio with B6-IFN-AR1<sup>-/-</sup> T cells (expressing the CD45.2 isoform) to IFN- $\beta$ .  
15 If the TI-IFN-induced inhibition of IL-10 signaling requires the synthesis and secretion of an  
16 intermediate factor, this molecule would also affect the response of IFN-AR1<sup>-/-</sup> T cells in our co-  
17 culture system (**Fig. 5B**). Phospho-flow analysis indicated that while wild type Tmem and Treg  
18 cells showed a reduction of IL-10 signaling after IFN- $\beta$  exposure, the co-cultured IFN-AR1<sup>-/-</sup>  
19 cells remained completely unaffected (**Fig. 5C**). These results demonstrate that IFN- $\beta$  acts  
20 directly on T cells to condition IL-10 signaling.

21

22 **2.6 Alteration of surface IL-10 receptor expression or induction of SOCS molecules are not**  
23 **responsible for inhibition of IL10 signaling**

1 Downregulation of IL-10R surface expression would be a plausible mechanism to account for  
2 the inhibition of IL-10 signaling following exposure to TI-IFN. However, flow cytometric  
3 analysis of IL-10R surface expression did not support this hypothesis. IFN- $\beta$  exposed T cells  
4 (both Tmem and Treg), expressed levels of the receptor comparable to that of non-exposed cells  
5 (**Fig. 6A**). In line with this, the comparison of IL-10R expression between NOD T cells isolated  
6 from the PLN, MLN, ALN, and spleen showed no differences in the mean fluorescence intensity  
7 (**Fig. 6B**). This result suggested the involvement of an IL-10R specific regulator acting between  
8 the receptor and STAT3 (as STAT3 remains available for the IL-6 receptor to be  
9 phosphorylated). Suppressor of cytokine signaling proteins (SOCSs) act as cytokine-inducible  
10 negative regulators of cytokine signaling. We tested if the transcriptional levels of SOCS1 (the  
11 only regulator reported in the literature to be associated with inhibition of IL-10 signaling in a  
12 lymphoma cell line) [29] and SOCS3 (as control) were increased by IFN- $\beta$  treatment. Despite a  
13 reduction in the SOCS1 and SOCS3 RNA levels in cultured T cells compared to fresh cells, the  
14 transcriptions levels of SOCS1 and SOCS3 were not increased by IFN- $\beta$  treatment (**Fig. 6C**).  
15 These results were confirmed in Tmem and Treg subpopulations via Prime FlowRNA  
16 (Affymetrix) - technology that allows detection via flow cytometry of RNA and protein  
17 expression simultaneously at single cell level - clearly showing that the levels of SOCS1 and  
18 SOCS3 RNA were not up-regulated in Tmem and Treg cells exposed to IFN- $\beta$  (**Fig. 6D**).

19

## 20 **2.7 The localized defective response to IL-10 in Tmem and Treg cells of NOD mice is** 21 **maintained with age**

22 Knowing if the inhibition of IL-10 signaling in T cells of PLN and MLN of NOD mice is  
23 sustained or altered over time is important for defining possible windows of therapeutic

1 intervention. The accumulation of TI-IFN in PLN [13] appears maintained over time, though to a  
2 progressively lower level. As the inhibition of IL-10 signaling correlates with TI-IFN levels, we  
3 executed a longitudinal analysis of the response to IL-10 and IL-6 by Treg and Tmem cells of  
4 female NOD mice of different ages (weeks: 2, 3, 4, 6, 12 and 18). An identical analysis was  
5 performed in age-matched female wt B6 mice. Throughout the observation period, the ratio of  
6 IL-10 induced P-STAT3 in T cells between PLN/spleen and MLN/spleen (as shown in Fig. 1)  
7 was significantly lower than that exhibited by B6 mice (**Fig. 7A**). Interestingly, in 2 week old B6  
8 mice the response to IL-10 of Tmem and Treg cells in PLN and MLN was slightly lower than  
9 that observed in the spleen (<100%), but it quickly recovered and stabilized (**Fig. 7A**).

10

## 11 **2.8 The early blockade of TI-IFN signaling partially restores the response to IL-10 in PLN** 12 **and MLN Tmem and Treg cells in NOD mice**

13 The reported delay and lower incidence of diabetes development in NOD mice treated at 2-3  
14 weeks of age with an anti-IFN-AR1 mAb [13], together with the reversibility of IL-10 signaling  
15 inhibition we observed in vitro in T cells after removing IFN- $\beta$ , are encouraging indications that  
16 the unbalanced immune regulation of NOD mice can be prevented or restored. To test if the  
17 therapeutic blockade of TI-IFN and alteration of IL-10 signaling were correlated *in vivo* in NOD  
18 mice, anti-IFN-AR1 mAb was administered on days 14 and 21 of age in female NOD mice and,  
19 on day 25, we measured the induction of P-STAT3 in PLN and MLN T cell subsets in response  
20 to ex-vivo IL-10 treatment. Both Tmem and Treg populations in PLN and MLN of anti-IFN-AR-  
21 treated animals showed a significant recovery in P-STAT3 induction in response to IL-10 (**Fig.**  
22 **7B&C**). These results suggest that the therapeutic effect of early administration of anti-IFN-AR1  
23 mAb in NOD mice may be due to the restoration of IL-10 signaling.

1  
2  
3  
4  
5  
6  
7  
8  
9  
10  
11  
12  
13  
14  
15  
16  
17  
18  
19  
20  
21  
22  
23  
24

### 3. Discussion

In addition to genetic susceptibility, type 1 diabetes development is clearly linked to still poorly defined environmental factors contributing to the initiation and/or progression of the disease. There is a growing number of reports that associate high levels of TI-IFN with the onset and progression of this pathology [8-10, 12-14]. However, mechanistic insights on how TI-IFN would favor type 1 diabetes development are lacking, contributing to a degree of confusion in understanding this connection. In particular, how the accumulation of TI-IFN could result in a localized effect that enables the activity of diabetogenic T cells remains an enigma. The finding that dendritic cells of NOD mice produce higher levels of TI-IFN in response to TLR stimulation than cells of B6 mice [30] provides an important clue to the causes of localized and chronic TI-IFN accumulation in PLN reported previously [13]. Based on our results, we propose that this chronic accumulation of TI-IFN in NOD mice, which we report for the first time also extends to the MLN, re-programs the response of CD4 Treg and Tmem to IL-10 and potentially diminishing the homeostatic regulation of diabetogenic cells. This phenomenon likely contributes to the progressive attack to the islets and development of the disease. This data is supported by the recovery of IL-10 signaling we observed after blockade of TI-IFN-IFNR1 interactions, a treatment that results in a reduction of the disease incidence and progression in NOD mice [13].

Our results provide some important clues on the molecular mechanism behind the inhibition of IL-10 signaling. The normal level of phosphorylation of STAT3 we measured in response to IL-6 in T cells pre-exposed to IFN- $\beta$  suggested that the impairment observed in IL-10 signaling is not caused by a generalized reduction in the cytoplasmic availability of STAT3. The lack of upregulation of mRNA levels of SOCS1 and SOCS3 and the unaltered (if not slightly increased)

1 expression of IL-10R in T cells we observed post-IFN- $\beta$  exposure both in vitro and in vivo do  
2 not support regulation of P-STAT3 induction at this level. Our results suggest then that an IL-10  
3 signaling negative regulator acting between the receptor and STAT3 phosphorylation is either  
4 being upregulated or activated. For example, direct or indirect alterations in the binding and  
5 phosphorylation of Jak1 and Tyk2 would regulate STAT3 activation [31]; the involvement of  
6 molecules that interact with STAT3, including other members of the STAT family, should also  
7 be explored as they could interfere with its binding to IL-10R and its phosphorylation [28].  
8 Interestingly, human monocytes and macrophages primed with IFN $\alpha/\beta$  showed an increase in  
9 IL-10R1 and an increase in IL-10 signaling [32]. However, these experiments were performed  
10 with an acute exposure (5 hours) to TI-IFN. A prolonged exposure of human macrophages to TI-  
11 IFN promoted a switch in the signaling of IL-10 from activation of STAT3 to STAT1 [33]; in  
12 our settings however STAT1 phosphorylation was not appreciable in any condition tested (not  
13 shown). Overall, these observations suggest that IFN- $\beta$  can have different consequences  
14 depending on the timing and context of exposure as well as on the target cell population,  
15 probably contributing to the (sometimes discordant) range of outcomes attributed to TI-IFN  
16 [34].

17 The protective effect of Tofacitinib and Ruxolitinib we observed in our experiments indicates  
18 that signaling through the Jak/STAT pathway is involved in this specific effect of TI-IFN –  
19 though we cannot exclude the participation of other signaling routes [35]. A deeper  
20 understanding of the molecular mediators of this phenomenon would be of crucial importance as  
21 some of these molecules could be targeted to control the development of diabetes. In fact,  
22 Jak1/Jak2 inhibition in vivo is effective at preventing, and reverting, established insulinitis in NOD

1 mice [36, 37]. Improving the efficacy and safety of this type of intervention would be a major  
2 advancement for type 1 diabetes patients.

3 Our study shows that Tmem and Treg with impaired IL-10 signaling are present not only in  
4 PLN but also in the regionally close MLN. Paralleling the results from Rahman and colleagues  
5 [30], this phenomenon is specific for NOD animals, as in B6 mice, the response to IL-10 was not  
6 affected. This strain-specific effect in lymph nodes draining the gut [38], suggests a link with the  
7 recently discovered role of the microbiota in autoimmune diabetes development [3, 4]: it could  
8 indicate an aberrant heightened chronic response to specific bacteria (or viruses) derivatives that  
9 is not properly regulated. The initial impairment in IL-10 signaling we observed in two-week-old  
10 B6 pups (similar to, but not to the same extent as, that of NOD mice, Figure 7), could indicate an  
11 initial adaptation phase of the newly generated pool of T cells (exposed to TI-IFN in the thymus)  
12 [39] to variations in the intestinal flora during the breast-feeding phase. This would suggest that  
13 the genetic predisposition of NOD mice encompass a defect in establishing the proper balance in  
14 the response to microbiota derivatives in the gut-draining lymph nodes that ultimately affects the  
15 regulation of diabetogenic T cells by IL-10.

16 We observed that the impact of TI-IFN is not specific to the NOD genetic background,  
17 suggesting that this novel mechanism of alteration of immunoregulation could also contribute to  
18 the development of other disorders with a TI-IFN signature.[40] This is a significant finding as  
19 the reduction of IL-10 signaling in Treg and Tmem populations has very deleterious effects on  
20 regulating autoreactivity [22, 24, 25]. In animal models of diabetes [41, 42] as well as diabetic  
21 patients [43], regulatory T cells exhibit reduced regulatory efficacy while effector T cells are  
22 resistant to regulation [42]. Altogether these results point toward a loss of regulation of  
23 autoreactive T lymphocytes as a key process in diabetes development. A selective targeting of

1 this phenomenon, by either correcting the aberrant production of TI-IFN or by preventing its  
2 modulation of IL-10 signaling, could significantly improve the efficacy of some approaches  
3 currently being explored for the treatment of type 1 diabetes [44]. Targeting IL-10 signaling has  
4 already been considered in the treatment of this disease [16, 17]. However, inconsistent effects  
5 have been reported [45-48]. Based on our results, we suggest that, rather than augmenting the  
6 concentration of IL-10, a targeted restoration of the IL-10 impact on diabetogenic cells (via a  
7 timed and localized intervention) would achieve more successful therapeutic outcomes. To this  
8 end, understanding how IL-10 modulates T cell function is necessary to identify the best strategy  
9 to recover an appropriate level of regulation but, to date, very little is known. We report here for  
10 the first time several genes (*Sphk1*, *LIGHT*, *Tarm1* and *2B4*) that IL-10 induces in T cells. We  
11 used their expression as readout of IL-10 function, demonstrating the impact of pre-exposure to  
12 TI-IFN. Future studies will be needed to understand their (and others') involvement in the  
13 modulation of T cell functions. Moreover, their differential expression profile between Tmem  
14 and Treg populations, suggests a distinct role in each population: a property that could also  
15 reveal strategies to selectively impact these two subsets.

16 In summary, our study unveils the existence of a new molecular mechanism through which  
17 TI-IFN can alter T cell regulation and improves our understanding of IL-10 mediated control of  
18 Treg and Tmem cells. A deeper understanding of this phenomenon will very likely reveal novel  
19 points of intervention to restore the necessary immune regulatory network to potentiate the  
20 efficacy of immunotherapies for type 1 diabetes and possibly other autoimmune diseases.

21

## 22 **4. Methods**

### 23 **4.1 Mice**

1 NOD, wt C57BL/6 (B6), IFN-AR1<sup>-/-</sup> and Rag<sup>-/-</sup> mice were purchased from Jackson Laboratories,  
2 and bred at the Johns Hopkins School of Medicine facility. All animal experiments were  
3 conducted in accordance with the National Institutes of Health guide for use and care of  
4 laboratory animals, and under a protocol approved by the JHU Animal Care and Use Committee.

#### 5 6 **4.2 Media, reagents and antibodies**

7 RPMI-1640 and IMDM media were supplemented with 10% v/v heat-inactivated FCS (Atlanta  
8 Biologicals, Flowery Branch, GA), 0.1 mM non-essential amino acids, 2 mM L-glutamine,  
9 sodium pyruvate, 100 IU/ml penicillin, 100 µg/ml streptomycin, and 50 µM 2-ME (Gibco).  
10 Recombinant IFN-β was purchased from PBL Assay Science. Blocking anti-IFN-AR1 mAb was  
11 from Leinco Technologies (St Louis, MO). Recombinant IL-10, and IL-6 were from PeproTech  
12 (Rocky Hill, NJ). Jak inhibitors Tofacitinib and Ruxolitinib were purchased from LC  
13 Laboratories (Woburn, MA).

14

#### 15 **4.3 T cell (subsets) isolation**

16 Spleen and lymph nodes were harvested and total/CD4 T cells were isolated via magnetic-bead  
17 negative selection. Briefly, cells were incubated with: anti-mouse Ter119 (TER-119), Gr1 (RB6-  
18 85C), CD11b (M1/70), B220 (RA3-6B2), CD16/32 (2.462), I-A/I-E (M5/114.15.2), (also anti-  
19 CD8 (53-6.7) for CD4 T cell purification) (all from BD Biosciences) followed by incubation  
20 with magnetic beads conjugated with anti-rat IgG (ThermoFisher) at a 1:1 (cell:bead) ratio. The  
21 resulting total/CD4 T cells were >90% pure. Where indicated, Treg (CD4<sup>+</sup>CD25<sup>+</sup>) were isolated  
22 from CD4 T cells following the protocol described in the EasySep PE-selection kit (STEMCELL  
23 technologies).



1

## 2 **4.4 CD4 memory T cell generation**

3 In some experiments, memory T cells were generated via a modification of the published  
4 “parking method” [27]. Briefly,  $20 \times 10^7$  T cells from B6 mice were activated with anti-CD3 (0.5  
5  $\mu\text{g/ml}$ ; BD Pharmingen) in the presence of syngeneic LPS-matured bone marrow-derived DCs  
6 (1:20 ratio DC:T cell) as previously described [49]. Three days later, activated T cells together  
7 with  $10^7$  T cell-depleted splenocytes (obtained via removal of CD3<sup>+</sup> cells from single cell  
8 suspensions using the protocol described in 2.3) were infused intravenously into Rag<sup>-/-</sup> mice.  
9 Four weeks later, memory T cells were isolated and used for the indicated experiments.

10

## 11 **4.5 Cell stimulation and preparation for Phospho-flow analysis**

12 For assessment of proteins phosphorylation via flow cytometry (Phospho-flow) a modification of  
13 the protocol published by the Nolan group [50] was utilized. Briefly, 10 to  $15 \times 10^6$  purified T  
14 cells were cultured in IMDM complete media with/without IFN- $\beta$  (1-25 ng/ml) for indicated  
15 periods and then rested in cytokine-free media for six additional hours.  $2 \times 10^6$  fresh/cultured cells  
16 were stimulated for 20 minutes with IL-10 (40 ng/ml) or IL-6 (40 ng/ml), or 30 minutes with  
17 IFN- $\beta$  (5 ng/ml). Then, cells were fixed for 50 minutes by adding 2.4 ml of a solution containing  
18 4% paraformaldehyde and 1.4% methanol in PBS. After fixation, 600  $\mu\text{l}$  of 1X wash buffer  
19 (contained in the Transcription Factor Phospho Buffer Set kit, BD Biosciences) were added to  
20 the previous mixture, mixed, and spun down. Finally, cells were suspended with 500  $\mu\text{l}$  Perm  
21 Buffer III (BD Biosciences) while vortexing, and stored at  $-20^\circ\text{C}$  until use.

22

## 23 **4.6 Flow cytometry**

1 In Phospho-flow experiments, Perm Buffer-III was removed and cells stained with fluorochrome-  
2 labeled antibodies against CD4 (RM4-5), CD44 (IM7), Foxp3 (FJK-1) (Thermo Fisher  
3 eBioscience) and Stat3 (pY705)(4/P\_STAT3; BD Phospho-flow). For IL-10R staining, the  
4 Human IL-10 biotinylated Fluorokine kit (R&D Systems) was used. Detection of SOCS1 and  
5 SOCS3 mRNA levels via flow cytometry was performed employing the PrimeFlow RNA assay  
6 kit (Thermo Fisher) following manufacturer guidelines. Data were acquired using a LSR-II flow  
7 cytometer (BD Biosystems) and analyzed with FlowJo X version software (FLOWJO, LLC,  
8 Ashland OR).

9

#### 10 **4.7 Quantitative Real-Time PCR**

11 CD4 T cells were lysed in TRIzol reagent (Thermo), and RNA was extracted using chloroform  
12 (Fisher Scientific) and the RNeasy MiniElute Cleanup Kit (Qiagen). The mRNA was reverse  
13 transcribed using the SuperScript IV First Strand Synthesis System and protocol (Thermo  
14 Scientific). Real time RT-PCR was performed on a QuantiStudio 12K Flex Real Time PCR  
15 system (Thermo Scientific) calibrated for SYBR Green detection. The primers and conditions  
16 employed are listed in Supplementary Table 1.

17

#### 18 **4.8 Statistical Analysis**

19 Differences in flow cytometry quantification of P-STAT3-mean fluorescence intensity (MFI)  
20 were analyzed using two-tailed paired Student *t* test. To minimize the impact of fluctuations in  
21 fluorescence among experiments, the coefficient index (MFI P-STAT3 in stimulated cells/MFI  
22 P-STAT3 in unstimulated cells) was calculated and averaged for each experiment and then used  
23 for statistical analysis. P-STAT3 expression comparisons between T cells of NOD and B6 mice

1 were analyzed using Two-way ANOVA. Two-tailed unpaired Student *t* test was applied to test  
2 gene expression differences from PCR experiments. All analyses were performed with Prism  
3 Software version 5.0 (GraphPad, La Jolla, CA).

4

### 5 **Aknowledgements**

6 The authors thank Sonia Santiago (laboratory manager), Xiaoling Zhang (flow cytometry  
7 specialist), both at Johns Hopkins University, for excellent technical assistance; Dawn Hull and  
8 Kamal Abdi (animal facility supervisors; Johns Hopkins University) for animal husbandry and  
9 care. We would also like to thank Dr. Ranjeny Thomas (University of Queensland, Australia),  
10 Dr. John Alcorn (University of Pittsburgh), Drs. Alan Scott, Thomas Donner, Edward Harhaj,  
11 Erika Darrah, Tory Johnson (Johns Hopkins University), Dr. Francesca Granucci (University of  
12 Milano-Bicocca, Italy), and Dr. Ivan Zanoni (Harvard University) for invaluable feedback on  
13 experimental design, troubleshooting, and manuscript preparation.

14

15 **Funding.** This work was supported by American Diabetes Association Junior Faculty Award  
16 1-10-JF-43, a Starzl Transplantation Institute Joseph Patrick Fellowship, a Pilot and Feasibility  
17 Grant from the Baltimore Diabetes Research Center, an American Association of Immunologists  
18 2016-2017 Careers in Immunology Fellowship, and JDRF strategic research agreement 2-SRA-  
19 2016-310-S-B (all to GR).

20

21 **Author contributions.** M.I and G.R. developed the project, researched data, designed  
22 experiments, and wrote the manuscript. A.A., M.C, and B.L. contributed to experimental design  
23 and researched data. C.T. and V.I. researched data. W.P.A.L and G.B. contributed to data  
24 interpretation, troubleshooting, and provided essential manuscript feedback. G.R is the guarantor

1 of this work and, as such, had full access to all the data in the study and take responsibility for the  
2 integrity of the data and the accuracy of the data analysis.

3

4 **Competing financial interests.** The authors declare no competing financial interests.

## 1 References

- 2 [1] Castano L, Eisenbarth GS. Type-I diabetes: a chronic autoimmune disease of human, mouse, and  
3 rat. *Annu Rev Immunol*, 1990;8:647-79.
- 4 [2] Petzold A, Solimena M, Knoch KP. Mechanisms of Beta Cell Dysfunction Associated With Viral  
5 Infection. *Current diabetes reports*, 2015;15:73.
- 6 [3] Scott FW, Pound LD, Patrick C, Eberhard CE, Crookshank JA. Where genes meet environment-  
7 integrating the role of gut luminal contents, immunity and pancreas in type 1 diabetes.  
8 *Translational research : the journal of laboratory and clinical medicine*, 2016.
- 9 [4] Li X, Atkinson MA. The role for gut permeability in the pathogenesis of type 1 diabetes--a solid  
10 or leaky concept? *Pediatric diabetes*, 2015;16:485-92.
- 11 [5] Shizuru JA, Taylor-Edwards C, Banks BA, Gregory AK, Fathman CG. Immunotherapy of the  
12 nonobese diabetic mouse: treatment with an antibody to T-helper lymphocytes. *Science*,  
13 1988;240:659-62.
- 14 [6] Thivolet C, Bendelac A, Bedossa P, Bach JF, Carnaud C. CD8+ T cell homing to the pancreas in the  
15 nonobese diabetic mouse is CD4+ T cell-dependent. *Journal of immunology*, 1991;146:85-8.
- 16 [7] Christianson SW, Shultz LD, Leiter EH. Adoptive transfer of diabetes into immunodeficient NOD-  
17 scid/scid mice. Relative contributions of CD4+ and CD8+ T-cells from diabetic versus prediabetic  
18 NOD.NON-Thy-1a donors. *Diabetes*, 1993;42:44-55.
- 19 [8] Niewold TB. Type I interferon in human autoimmunity. *Front Immunol*, 2014;5:306.
- 20 [9] Huang X, Yuang J, Goddard A, Foulis A, James RF, Lernmark A *et al*. Interferon expression in the  
21 pancreases of patients with type I diabetes. *Diabetes*, 1995;44:658-64.
- 22 [10] Meyer S, Woodward M, Hertel C, Vlaicu P, Haque Y, Karner J *et al*. AIRE-Deficient Patients  
23 Harbor Unique High-Affinity Disease-Ameliorating Autoantibodies. *Cell*, 2016;166:582-95.
- 24 [11] Stewart TA, Hultgren B, Huang X, Pitts-Meek S, Hully J, MacLachlan NJ. Induction of type I  
25 diabetes by interferon-alpha in transgenic mice. *Science*, 1993;260:1942-6.
- 26 [12] Pearson JA, Wong FS, Wen L. The importance of the Non Obese Diabetic (NOD) mouse model in  
27 autoimmune diabetes. *Journal of autoimmunity*, 2016;66:76-88.
- 28 [13] Li Q, Xu B, Michie SA, Rubins KH, Schreiber RD, McDevitt HO. Interferon-alpha initiates type 1  
29 diabetes in nonobese diabetic mice. *Proc Natl Acad Sci U S A*, 2008;105:12439-44.
- 30 [14] Ferreira RC, Guo H, Coulson RM, Smyth DJ, Pekalski ML, Burren OS *et al*. A type I interferon  
31 transcriptional signature precedes autoimmunity in children genetically at risk for type 1  
32 diabetes. *Diabetes*, 2014;63:2538-50.
- 33 [15] Sabat R, Grutz G, Warszawska K, Kirsch S, Witte E, Wolk K *et al*. Biology of interleukin-10.  
34 *Cytokine & growth factor reviews*, 2010;21:331-44.
- 35 [16] Teros T, Hakala R, Ylinen L, Liukas A, Arvilommi P, Sainio-Pollanen S *et al*. Cytokine balance and  
36 lipid antigen presentation in the NOD mouse pancreas during development of insulinitis.  
37 *Pancreas*, 2000;20:191-6.
- 38 [17] Kaas A, Pflieger C, Kharagitsingh AV, Schloot NC, Hansen L, Buschard K *et al*. Association  
39 between age, IL-10, IFN $\gamma$ , stimulated C-peptide and disease progression in children with  
40 newly diagnosed Type 1 diabetes. *Diabetic medicine : a journal of the British Diabetic*  
41 *Association*, 2012;29:734-41.
- 42 [18] Ip WKE, Hoshi N. Anti-inflammatory effect of IL-10 mediated by metabolic reprogramming of  
43 macrophages, 2017;356:513-9.
- 44 [19] de Waal Malefyt R, Yssel H, de Vries JE. Direct effects of IL-10 on subsets of human CD4+ T cell  
45 clones and resting T cells. Specific inhibition of IL-2 production and proliferation. *J Immunol*,  
46 1993;150:4754-65.

- 1 [20] Joss A, Akdis M, Faith A, Blaser K, Akdis CA. IL-10 directly acts on T cells by specifically altering  
2 the CD28 co-stimulation pathway. *Eur J Immunol*, 2000;30:1683-90.
- 3 [21] Huber S, Gagliani N, Esplugues E, O'Connor W, Jr., Huber FJ, Chaudhry A *et al.* Th17 cells express  
4 interleukin-10 receptor and are controlled by Foxp3(-) and Foxp3+ regulatory CD4+ T cells in an  
5 interleukin-10-dependent manner. *Immunity*, 2011;34:554-65.
- 6 [22] Kamanaka M, Huber S, Zenewicz LA, Gagliani N, Rathinam C, O'Connor W, Jr. *et al.*  
7 Memory/effector (CD45RB(lo)) CD4 T cells are controlled directly by IL-10 and cause IL-22-  
8 dependent intestinal pathology. *J Exp Med*, 2011;208:1027-40.
- 9 [23] Naundorf S, Schroder M, Hoflich C, Suman N, Volk HD, Grutz G. IL-10 interferes directly with  
10 TCR-induced IFN-gamma but not IL-17 production in memory T cells. *Eur J Immunol*,  
11 2009;39:1066-77.
- 12 [24] Murai M, Turovskaya O, Kim G, Madan R, Karp CL, Cheroutre H *et al.* Interleukin 10 acts on  
13 regulatory T cells to maintain expression of the transcription factor Foxp3 and suppressive  
14 function in mice with colitis. *Nat Immunol*, 2009;10:1178-84.
- 15 [25] Chaudhry A, Samstein RM, Treuting P, Liang Y, Pils MC, Heinrich JM *et al.* Interleukin-10 signaling  
16 in regulatory T cells is required for suppression of Th17 cell-mediated inflammation. *Immunity*,  
17 2011;34:566-78.
- 18 [26] Pike KA, Hutchins AP, Vinette V, Theberge JF, Sabbagh L, Tremblay ML *et al.* Protein tyrosine  
19 phosphatase 1B is a regulator of the interleukin-10-induced transcriptional program in  
20 macrophages. *Sci Signal*, 2014;7:ra43.
- 21 [27] Lai W, Yu M, Huang MN, Okoye F, Keegan AD, Farber DL. Transcriptional control of rapid recall  
22 by memory CD4 T cells. *J Immunol*, 2011;187:133-40.
- 23 [28] Ivashkiv LB, Donlin LT. Regulation of type I interferon responses. *Nature reviews Immunology*,  
24 2014;14:36-49.
- 25 [29] Ding Y, Chen D, Tarcsafalvi A, Su R, Qin L, Bromberg JS. Suppressor of cytokine signaling 1  
26 inhibits IL-10-mediated immune responses. *J Immunol*, 2003;170:1383-91.
- 27 [30] Rahman MJ, Rahir G, Dong MB, Zhao Y, Rodrigues KB, Hotta-Iwamura C *et al.* Despite Increased  
28 Type 1 IFN, Autoimmune Nonobese Diabetic Mice Display Impaired Dendritic Cell Response to  
29 CpG and Decreased Nuclear Localization of IFN-Activated STAT1. *Journal of immunology*,  
30 2016;196:2031-40.
- 31 [31] Weber-Nordt RM, Riley JK, Greenlund AC, Moore KW, Darnell JE, Schreiber RD. Stat3  
32 recruitment by two distinct ligand-induced, tyrosine-phosphorylated docking sites in the  
33 interleukin-10 receptor intracellular domain. *The Journal of biological chemistry*,  
34 1996;271:27954-61.
- 35 [32] Liu BS, Janssen HL, Boonstra A. Type I and III interferons enhance IL-10R expression on human  
36 monocytes and macrophages, resulting in IL-10-mediated suppression of TLR-induced IL-12.  
37 *European journal of immunology*, 2012;42:2431-40.
- 38 [33] Herrero C, Hu X, Li WP, Samuels S, Sharif MN, Kotenko S *et al.* Reprogramming of IL-10 activity  
39 and signaling by IFN-gamma. *J Immunol*, 2003;171:5034-41.
- 40 [34] Sozzani S, Bosisio D, Scarsi M, Tincani A. Type I interferons in systemic autoimmunity.  
41 *Autoimmunity*, 2010;43:196-203.
- 42 [35] Plataniias LC. Mechanisms of type-I- and type-II-interferon-mediated signalling. *Nat Rev*  
43 *Immunol*, 2005;5:375-86.
- 44 [36] Trivedi PM, Graham KL, Scott NA, Jenkins MR, Majaw S, Sutherland RM *et al.* Repurposed  
45 JAK1/JAK2 Inhibitor Reverses Established Autoimmune Insulinitis in NOD Mice. *Diabetes*,  
46 2017;66:1650-60.

- 1 [37] Davoodi-Semiromi A, Wasserfall CH, Xia CQ, Cooper-DeHoff RM, Wabitsch M, Clare-Salzler M *et al.* The tyrphostin agent AG490 prevents and reverses type 1 diabetes in NOD mice. *PloS one*,  
2 2012;7:e36079.  
3
- 4 [38] Turley SJ, Lee JW, Dutton-Swain N, Mathis D, Benoist C. Endocrine self and gut non-self intersect  
5 in the pancreatic lymph nodes. *Proceedings of the National Academy of Sciences of the United*  
6 *States of America*, 2005;102:17729-33.  
7
- 8 [39] Xing Y, Wang X, Jameson SC, Hogquist KA. Late stages of T cell maturation in the thymus involve  
9 NF-kappaB and tonic type I interferon signaling. *Nature immunology*, 2016;17:565-73.  
10
- 11 [40] Hall JC, Rosen A. Type I interferons: crucial participants in disease amplification in autoimmunity.  
12 *Nature reviews Rheumatology*, 2010;6:40-9.  
13
- 14 [41] Tang Q, Adams JY, Penaranda C, Melli K, Piaggio E, Sgouroudis E *et al.* Central role of defective  
15 interleukin-2 production in the triggering of islet autoimmune destruction. *Immunity*,  
16 2008;28:687-97.  
17
- 18 [42] D'Alise AM, Auyeung V, Feuerer M, Nishio J, Fontenot J, Benoist C *et al.* The defect in T-cell  
19 regulation in NOD mice is an effect on the T-cell effectors. *Proc Natl Acad Sci U S A*,  
20 2008;105:19857-62.  
21
- 22 [43] Monti P, Scirpoli M, Maffi P, Piemonti L, Secchi A, Bonifacio E *et al.* Rapamycin monotherapy in  
23 patients with type 1 diabetes modifies CD4+CD25+FOXP3+ regulatory T-cells. *Diabetes*,  
24 2008;57:2341-7.  
25
- 26 [44] Skyler JS. Prevention and reversal of type 1 diabetes--past challenges and future opportunities.  
27 *Diabetes care*, 2015;38:997-1007.  
28
- 29 [45] Saxena A, Khosraviani S, Noel S, Mohan D, Donner T, Hamad AR. Interleukin-10 paradox: A  
30 potent immunoregulatory cytokine that has been difficult to harness for immunotherapy.  
31 *Cytokine*, 2015;74:27-34.  
32
- 33 [46] Li C, Zhang L, Chen Y, Lin X, Li T. Protective role of adenovirus vector-mediated interleukin-10  
34 gene therapy on endogenous islet beta-cells in recent-onset type 1 diabetes in NOD mice.  
35 *Experimental and therapeutic medicine*, 2016;11:1625-32.  
36
- 37 [47] Wogensen L, Lee MS, Sarvetnick N. Production of interleukin 10 by islet cells accelerates  
38 immune-mediated destruction of beta cells in nonobese diabetic mice. *The Journal of*  
39 *experimental medicine*, 1994;179:1379-84.  
40
- 41 [48] Balasa B, Van Gunst K, Jung N, Katz JD, Sarvetnick N. IL-10 deficiency does not inhibit insulinitis  
and accelerates cyclophosphamide-induced diabetes in the nonobese diabetic mouse. *Cellular*  
*immunology*, 2000;202:97-102.
- [49] Raimondi G, Sumpter TL, Matta BM, Pillai M, Corbitt N, Vodovotz Y *et al.* Mammalian target of  
rapamycin inhibition and alloantigen-specific regulatory T cells synergize to promote long-term  
graft survival in immunocompetent recipients. *J Immunol*, 2010;184:624-36.
- [50] Krutzik PO, Trejo A, Schulz KR, Nolan GP. Phospho flow cytometry methods for the analysis of  
kinase signaling in cell lines and primary human blood samples. *Methods in molecular biology*  
(Clifton, NJ), 2011;699:179-202.

1 **Figures**

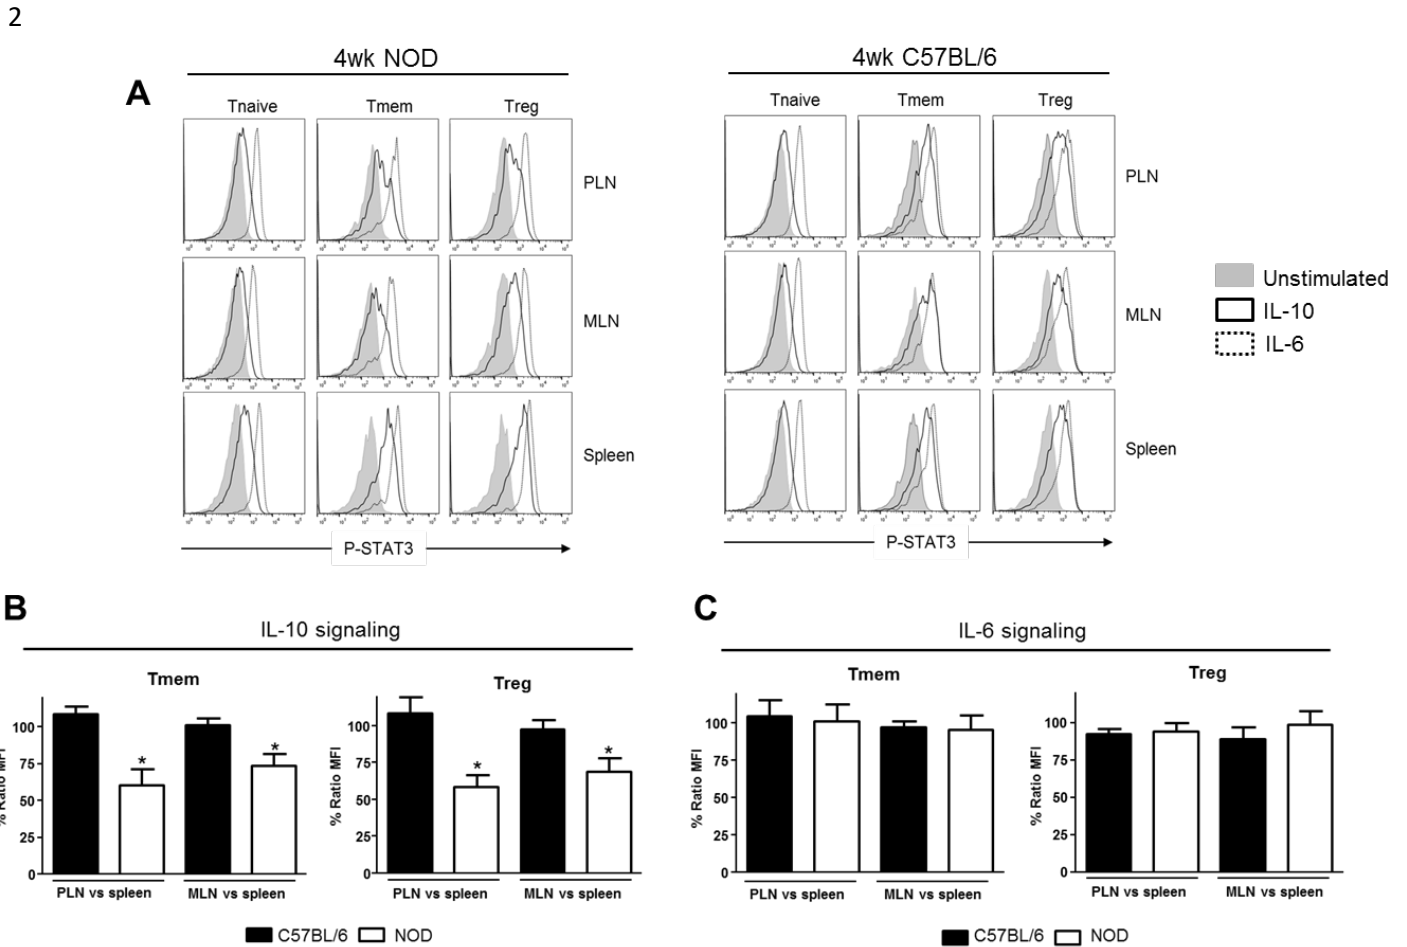

3

4 **Figure 1. Defective IL-10 signaling in Tmem and Treg cells in pancreatic and mesenteric**

5 **lymph nodes of NOD mice.** Cells of pancreatic lymph nodes (PLN), mesenteric lymph nodes

6 (MLN), and spleens of 4 week old NOD or C57BL/6 mice were either left untreated or stimulated

7 with IL-10 (40 ng/ml) or IL-6 (40 ng/ml) for 20 min. Phosphorylated-STAT3 (P-STAT3) levels

8 induced in CD4 T cell subpopulations (Tnaive: CD4<sup>+</sup>CD44<sup>low</sup>Foxp3<sup>-</sup>, Tmem: CD4<sup>+</sup>CD44<sup>hi</sup>Foxp3<sup>-</sup>

9 , Treg: CD4<sup>+</sup>Foxp3<sup>+</sup>) were measured by Phospho-flow. (A) Representative histograms of P-

10 STAT3 levels in the indicated CD4 T cell subpopulations after IL-10 and IL-6 stimulation. (B-C)

11 Cumulative representation of the percentage of P-STAT3 signal induction in PLN/MLN Tmem



1 and Treg after IL-10 (B) or IL-6 (C) stimulation compared to level induced in the splenic  
2 populations of the indicated mouse strain. This ratio of MFIs was calculated by comparing the  
3 coefficient index of P-STAT3 between two different tissues, considering the levels in spleen as  
4 100% of expression. Data shown in (B) and (C) is the average from n=4 mice per strain and is  
5 expressed as % of Ratio MFI $\pm$ SEM, \*p<0.05, paired Student's t test.

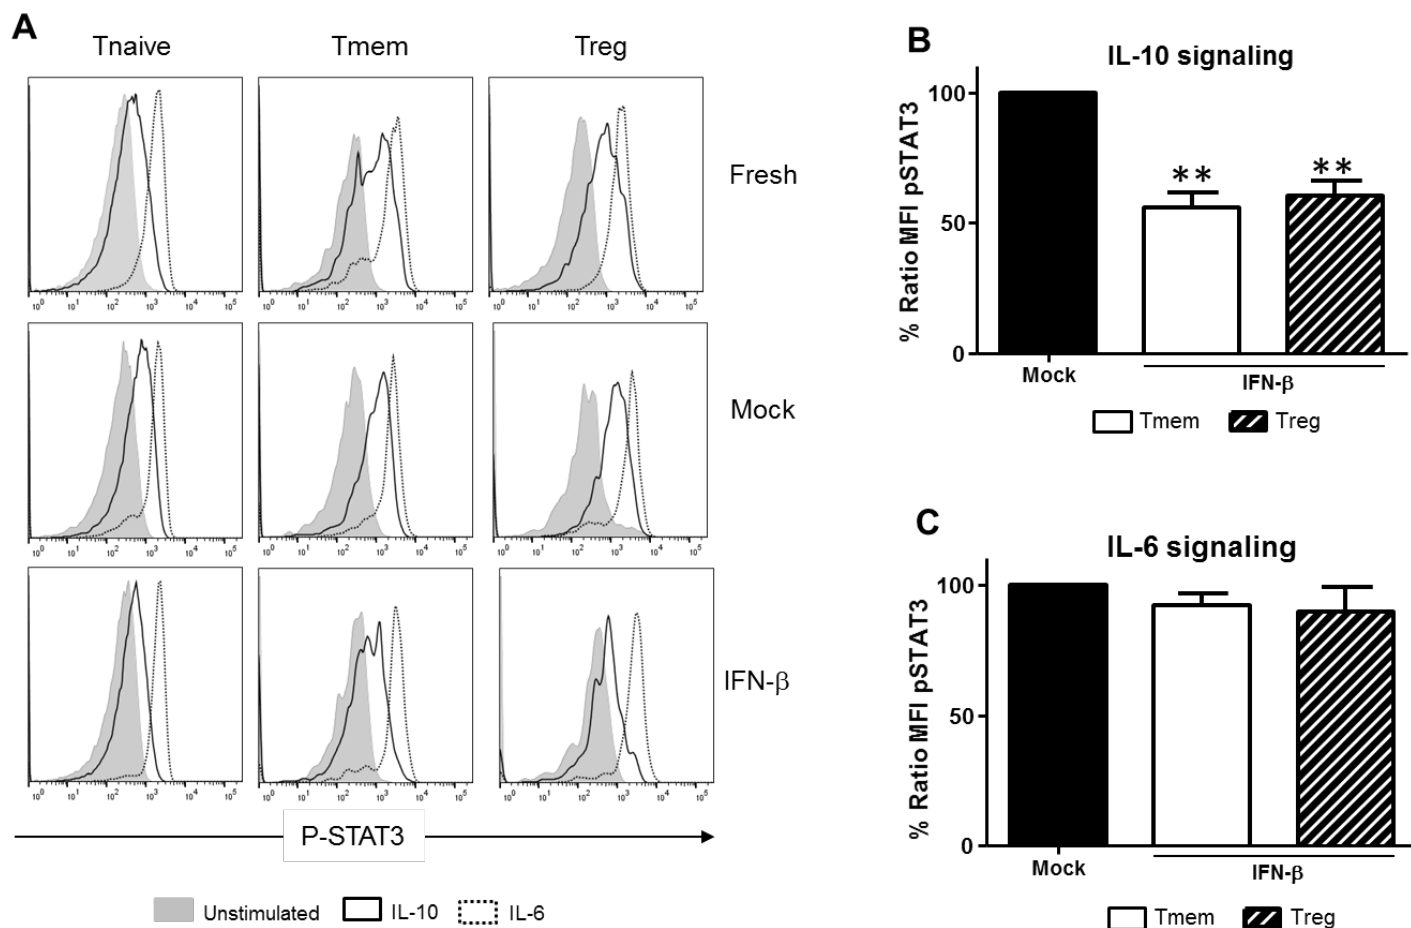

1

2 **Figure 2. Exposure to IFN- $\beta$  induces a selective inhibition of IL-10 signaling in CD4 Tmem**

3 **and Treg irrespective of the strain of origin.** Purified T cells from C57BL/6 mice were freshly

4 stimulated or cultured for 48h in complete media with or without IFN- $\beta$  (5ng/ml), and rested in

5 cytokine-free media for six additional hours. Cells were then either left untreated or stimulated

6 with IL-10 (40 ng/ml) or IL-6 (40 ng/ml) and the levels of P-STAT3 in CD4 T cell subpopulations

7 were measured by phospho-flow as in Figure 1. (A) Representative histograms of the MFI levels

8 of P-STAT3 in the different CD4 T cell subpopulations of fresh, mock and IFN- $\beta$  exposed T cells

9 after IL-10 and IL-6 stimulation. (B-C) Graph bars that compare the percentage of P-STAT3 MFI

10 ratio between IFN- $\beta$  exposed and not exposed (mock) cultured Tmem and Treg cells after IL-10

- 1 (B) or IL-6 (C) stimulation. Ratio MFI was calculated comparing the coefficient index of P-
- 2 STAT3 after stimulation between the two different culture conditions, considering levels in mock
- 3 cells as 100% of expression. Data from n=6 individual experiments are shown and expressed as %
- 4 of Ratio MFI±SEM, \*\*p<0.01, paired Student's t test.

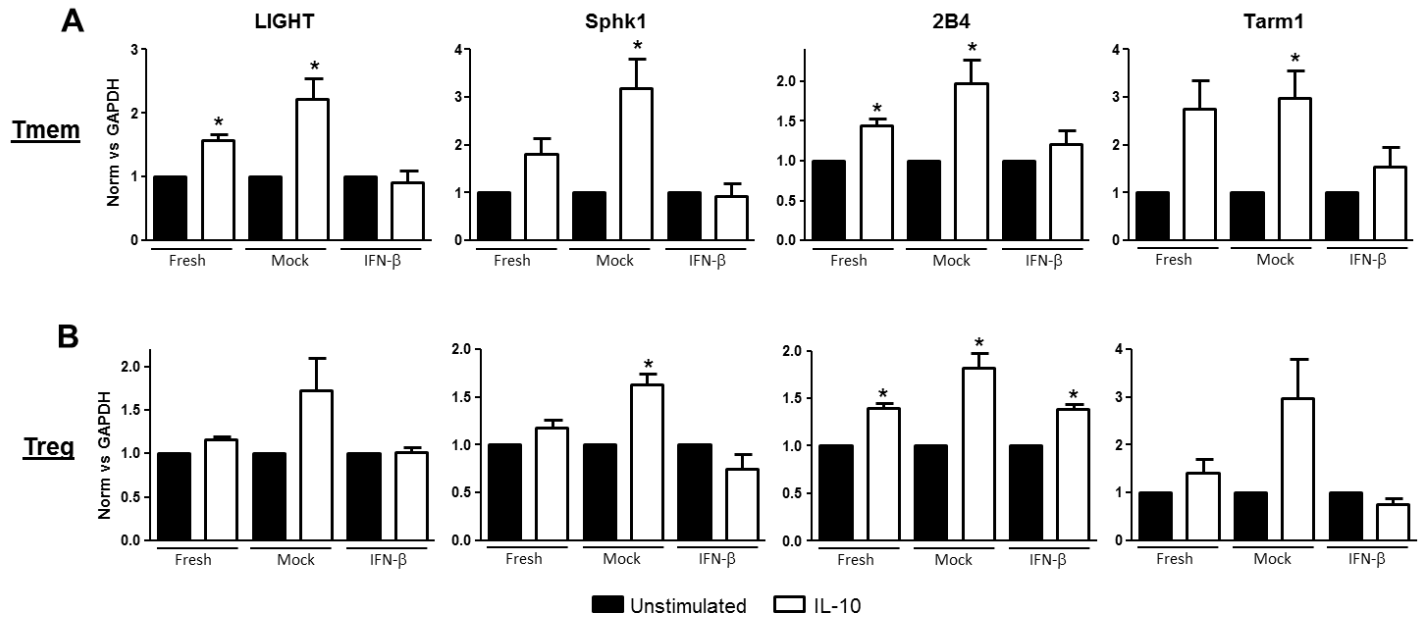

1

2 **Figure 3. Expression of IL-10 regulated genes in T cells is abrogated after exposure to IFN-**

3 **β.** (A) Freshly purified CD4 Tmem cells (obtained using the “parking method”; see material and

4 methods) and (B) CD4<sup>+</sup>CD25<sup>+</sup> Treg cells from C57BL/6 mice were left untreated or cultured 48h

5 without (Mock) or with IFN-β (5ng/ml). After an additional 4 hours of resting culture (without

6 stimuli), cells were either left untreated or stimulated for 4 hours with IL-10 (40 ng/ml). Cell were

7 then lysed and mRNA levels of *LIGHT*, *Sphk1*, *2B4* and *Tarm1* genes were measured by qPCR.

8  $\Delta\Delta$ Ct method was used to calculate their relative expression and normalized to GAPDH. The graph

9 bars show the fold change between unstimulated and IL-10 stimulated cells in every condition

10  $\pm$ SEM where \*p<0.01 in paired Student’s t test was considered with statistically significance. Data

11 shows the average of n=3 independent experiments.

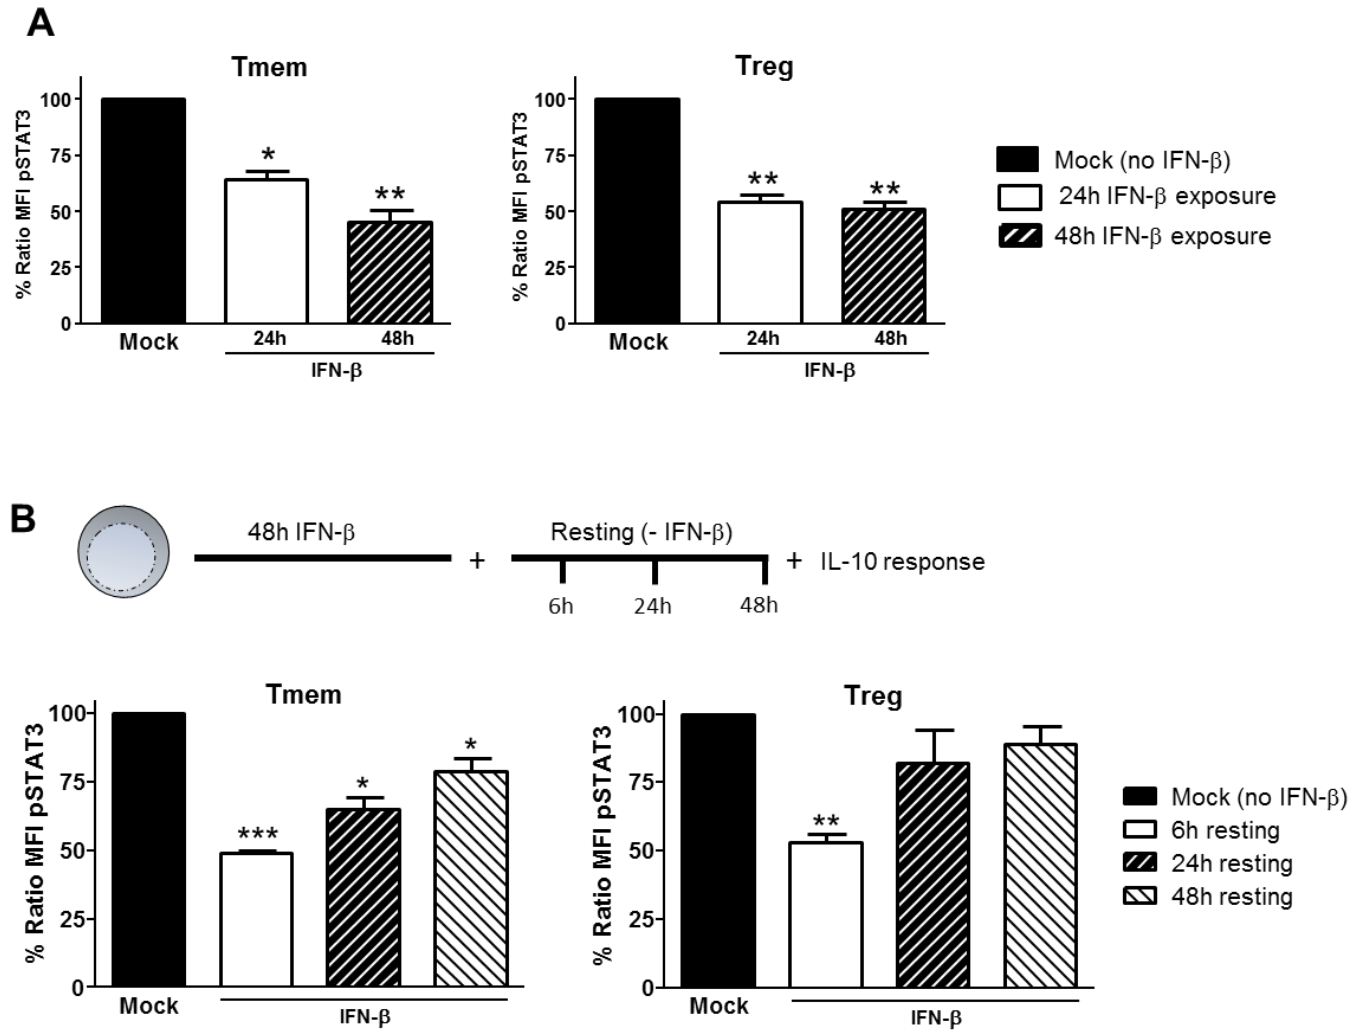

1

2 **Figure 4. Induction of IL-10 signaling inhibition in T cells requires prolonged exposure to**

3 **IFN- $\beta$  but is reversible.** (A) Purified T cells from C57BL/6 mice were cultured for 24 or 48h with

4 or without IFN- $\beta$  (5ng/ml), and rested in cytokine-free media for six additional hours. Cells were

5 then left untreated or stimulated with IL-10 (40 ng/ml) and the inhibition of P-STAT3 induction

6 by IL-10 assessed as indicated in Figure 1. (B) Purified T cells from C57BL/6 mice were cultured

7 for 48h with or without IFN- $\beta$  (5ng/ml) and then rested in cytokine-free media for the indicated

8 time (6, 24, 48h). The levels of P-STAT3 in response to IL-10 (40 ng/ml) were then assessed as

9 previously indicated. The ratio MFI (panels A-B) was calculated comparing the coefficient index

- 1 of P-STAT3 after IL-10 stimulation between IFN- $\beta$  exposed and mock, considering levels in mock
- 2 cells as 100% of expression. Data of n=3 individual experiments are shown and expressed as % of
- 3 Ratio MFI $\pm$ SEM, \*p<0.05, \*\*p $\leq$ 0.01, \*\*\*p $\leq$ 0.01, paired Student's t test.

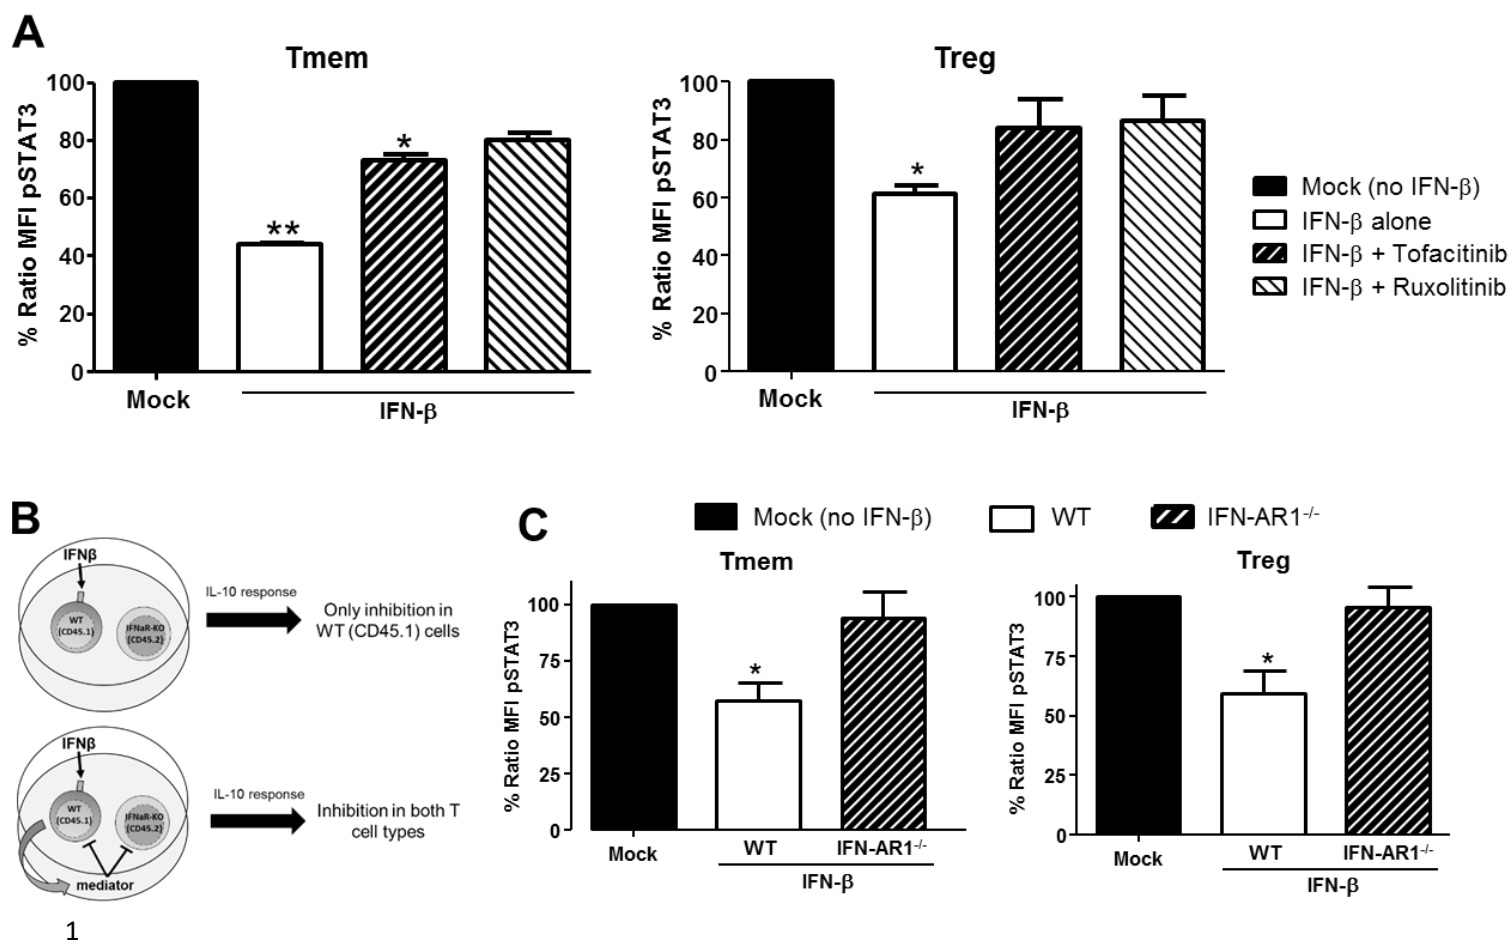

1  
2 **Figure 5. IFN-β signals through JAK-STAT pathway to directly inhibit IL-10 signaling in T**  
3 **cells.** (A) Impact of JAK-STAT inhibition on the ability of IFN-β to modulate IL-10 signaling. T  
4 cells from C57BL/6 mice were exposed to Tofacitinib (25μM) or Ruxolitinib (5μM) for 2 h before  
5 addition of IFN-β and then cultured for 48h (followed by a 6 to 8 h resting phase in cytokine-free  
6 media). Their ability to respond to IL-10 (40 ng/ml) or IL-6 (40 ng/ml) was then measured by  
7 means of P-STAT3 levels assessed via Phospho-Flow. (B) Schematic representation of the  
8 experimental approach adopted to assess the direct or indirect impact of IFN-β. (C) Purified T  
9 cells from congenic C57BL/6 (CD45.1) and IFN-AR1<sup>-/-</sup> (CD45.2) mice were mixed at a 1:1 ratio.  
10 This mix was then cultured for 48h with or without IFN-β (5ng/ml), and rested in cytokine-free  
11 media for additional 6 h. The response to IL-10 of each sub-population was then assessed via

- 1 Phospho-Flow. Data of n=3 individual experiments are shown and expressed as % of Ratio
- 2 MFI±SEM, \*p<0.05, \*\*p≤0.01, paired Student's t test.



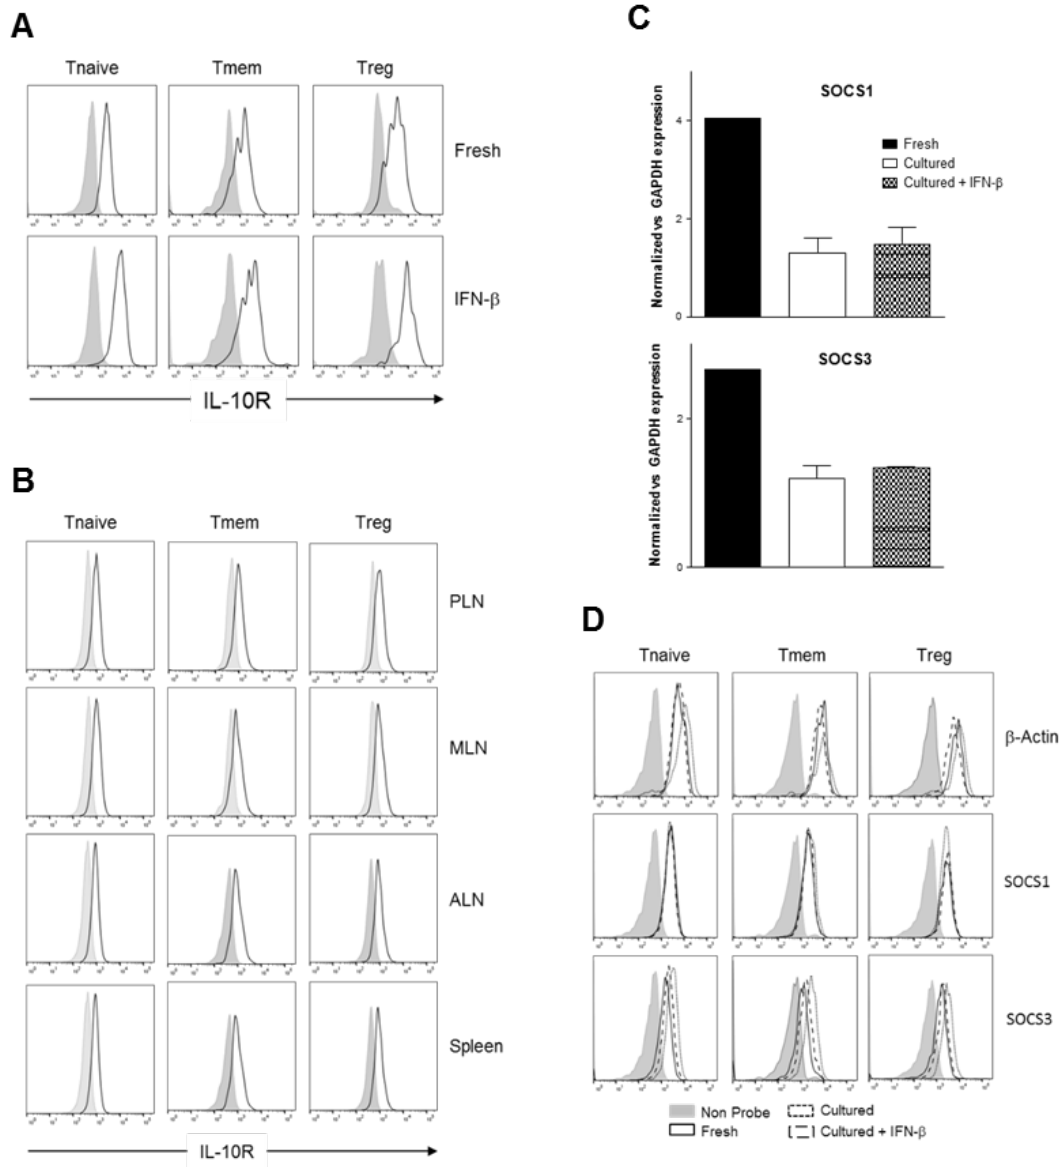

1

2 **Figure 6. Alteration of surface IL-10R expression or induction of SOCS molecules are not**

3 **responsible for the inhibition of IL-10 signaling induced by IFN- $\beta$ .** (A&B) T cells from

4 C57BL/6 mice (freshly-isolated or post in vitro exposure to IFN- $\beta$ ; A) or total cells from PLN,

5 MLN, axillary LN (ALN), and spleen of 4 week old NOD mice (B) were stained for their

6 expression of IL-10R in the indicated CD4 T cell subpopulation by flow cytometry. (C&D)

7 Purified CD4 Tmem (obtained via the “parking method) and Treg (C), or bulk T cells from

1 C57BL/6 mice (D) were left untreated or cultured for 48h with or without IFN- $\beta$  (5ng/ml) and the  
2 mRNA levels of SOCS1 and SOCS3 assessed by qPCR (C) and by Prime FlowRNA (D). In C,  
3 graph bars show qPCR results, calculated using  $\Delta\Delta C_t$  method and normalized with GAPDH  
4 expression. Data of n=3 individual experiments are shown and expressed as a Fold change  $\pm$ SEM.  
5 In D, histograms show mRNA levels of SOCS1 and SOCS3 in CD4 T cell subpopulations in the  
6 indicated conditions; levels of  $\beta$ -actin are also shown as a control. Representative results of n=2  
7 experiments are shown.

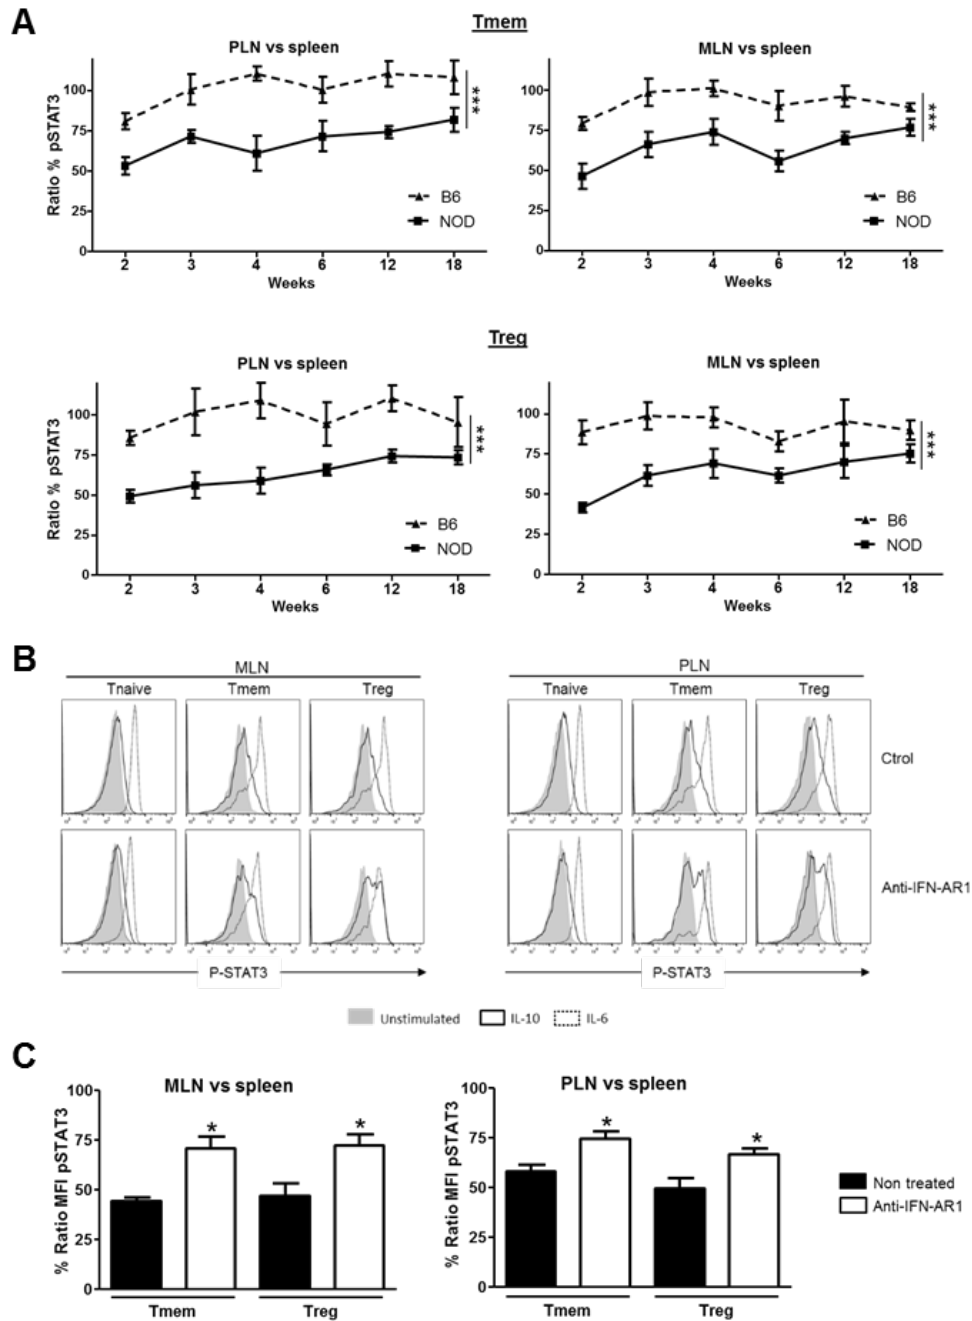

1

2 **Figure 7. The localized inhibition of IL-10 signaling in T cells is sustained throughout the life**  
 3 **of NOD mice and depends on IFN- $\beta$  signaling. (A)** P-STAT3 induction in response to IL-10 in  
 4 T cell subsets of PLN, MLN, and spleen collected from NOD and C57BL/6 mice at the indicated  
 5 age. Graph indicate the kinetic of P-STAT3 MFI ratio between the spleen and PLN or MLN (as

1 indicated) Tmem and Treg after IL-10 stimulation. Final value was calculated by comparing the  
2 coefficient index of P-STAT3 between the two different organs, considering the levels in spleen  
3 as 100% of expression. Data of n=4 mice per strain and per age point are shown and expressed as  
4 % of Ratio MFI±SEM. Differences between B6 and NOD were calculated using a Two-Way  
5 ANOVA ( \*\*\*p<0.001). **(B&C)**. Transient blockade of TI-IFN signaling partially restores IL-10  
6 signaling in T cells. NOD mice were treated with control or a blocking anti-IFNA-R mAb (0.5 mg  
7 on day 14 and 21 of age) and, on day 25, PLN, MLN and spleen were extracted. Cells were left  
8 untreated or stimulated with IL-10 (40 ng/ml) or IL-6 (40 ng/ml) and the levels of P-STAT3 in  
9 CD4 T cell subpopulations measured via Phospho-flow. Representative histograms are presented  
10 in (B). Cumulative results are shown in (C), where graph bars represent the normalized P-STAT3  
11 MFI ratio in Tmem or Treg after IL-10 stimulation between the spleen and PLN or MLN in control  
12 vs treated NOD mice. Ratio MFI was calculated by comparing the coefficient index of P-STAT3  
13 between the two different organs, considering the levels in spleen as 100% of expression. Data of  
14 n=4 mice per treatment group are shown and expressed as % of Ratio MFI±SEM, \*p<0.05, paired  
15 Student's t test.

## Supplementary Figures

- **Figure supplementary 1.** Dose-effect of IFN- $\beta$  inhibiting IL-10 signaling in T cells.
- **Figure supplementary 2.** Genes tested for expression/modulation after IL-10 stimulation in T cells.
- **Figure supplementary 3.** Effect of Tofacitinib and Ruxolitinib in cytokine signaling.
- **Figure supplementary 4.** Response of IFN-AR1<sup>-/-</sup> T cells to IL-10 stimulation

## Supplementary Tables

- **Table supplementary 1.** Sequence of primers used in RT-PCT studies

### Figure Supplementary 1.

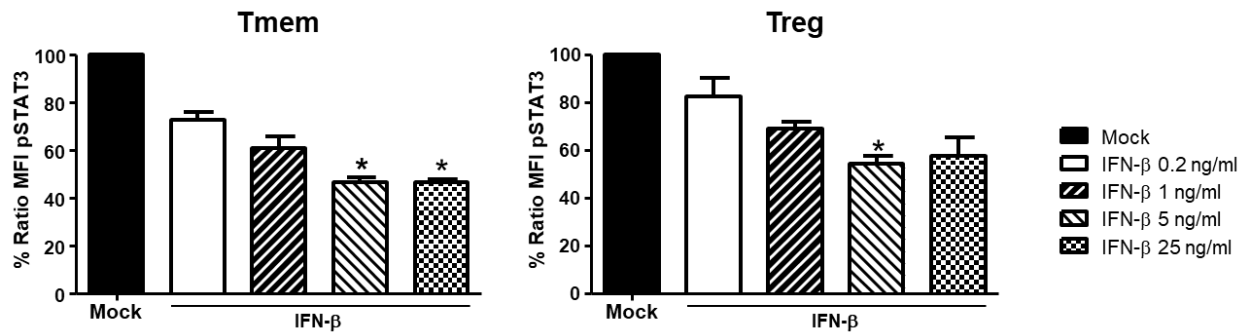

**Figure Supplementary 1. Dose-effect of IFN- $\beta$  inhibiting IL-10 signaling in T cells.** Purified T cells from C57BL/6 mice were cultured for 48h in RPMI complete media in the absence (mock culture) or presence of different concentrations of IFN- $\beta$  (0.2-25ng/ml), and rested in cytokine-free media for six more hours. Cells then were either left untreated or stimulated with IL-10 (40 ng/ml) for 20'. After a fixation step, the levels of P-STAT3 in CD4 T cell subpopulations (Tmem: CD4<sup>+</sup>CD44<sup>hi</sup>Foxp3<sup>-</sup>, Treg: CD4<sup>+</sup>Foxp3<sup>+</sup>) were measured by phosphor-flow. The graph bars compare the percentage of P-STAT3 MFI ratio in Tmem and Treg cells between the groups exposed to IFN- $\beta$  and mock condition (considered as 100% of response) after IL-10 stimulation. Ratio MFI was calculated comparing the coefficient index of P-STAT3 after stimulation between each of the IFN- $\beta$  exposed groups and mock. Data of n=3 individual experiments are shown and expressed as % of Ratio MFI $\pm$ SEM, \*p<0.05, paired Student's t test.

## Figure Supplementary 2

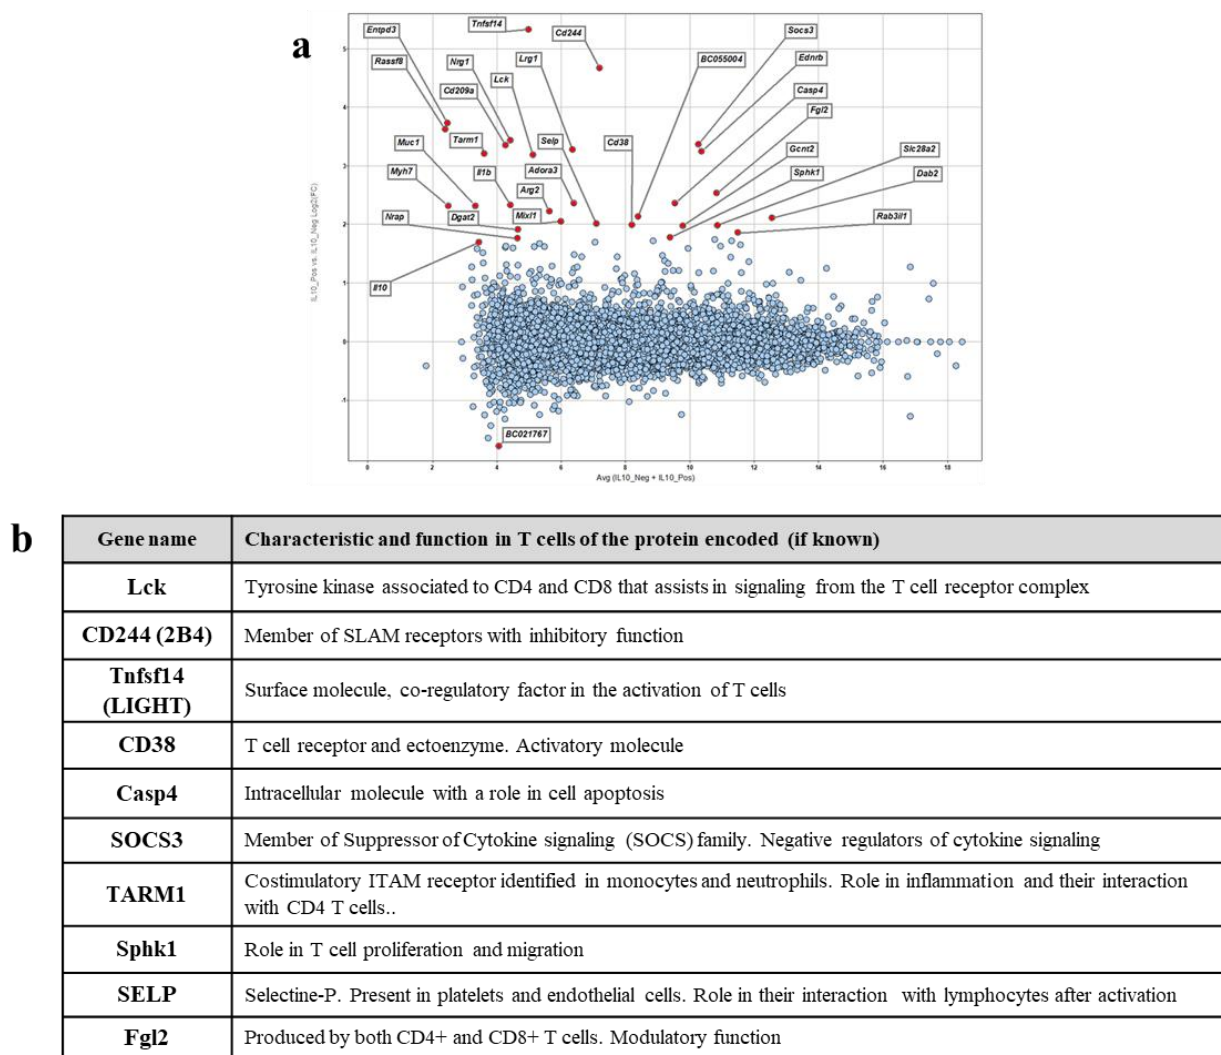

**Figure Supplementary 2. Genes tested for expression/modulation after IL-10 stimulation in T cells.** (a) Re-analysis of the RNaseq project evaluating mouse macrophage expression in response to IL-10 stimulation, GSE49449, deposited in the NCBI Gene Expression Omnibus (GEO) database. A two-tailed one-way ANOVA was performed to determine IL-10-treated versus untreated cells' differential gene expression. This differential expression was then evaluated for the standard deviation,  $\sigma$  or SD, of each gene's log2 fold change from the mean, of zero or unchanged. The 29 genes highly upregulated ( $>6SD$ ) are indicated. (b) The table shows the 10 genes among the 29 indicated in (a), that we found also described in T lymphocytes. Characteristics and function (if known) of the protein encoded are indicated.

### Figure Supplementary 3

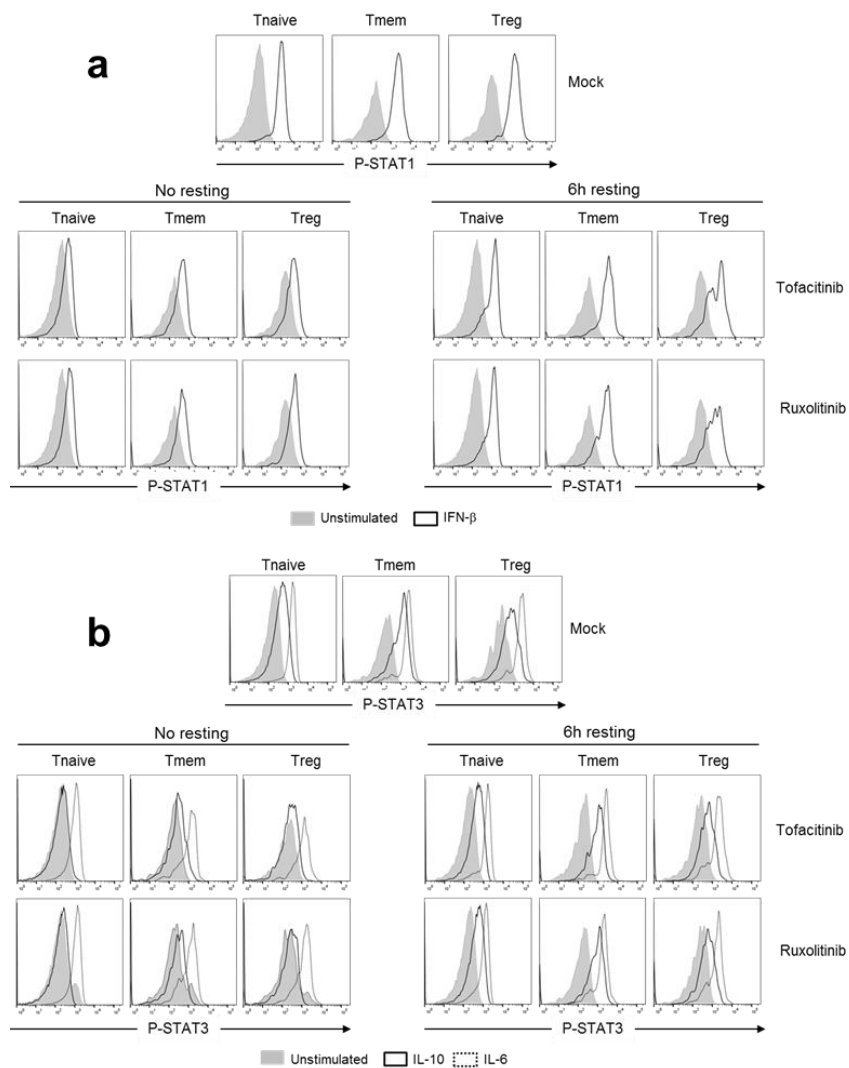

**Figure Supplementary 3. Effect of Tofacitinib and Ruxolitinib in cytokine signaling.** (a&b) Purified T cells from C57BL/6 mice were cultured for 48h in RPMI complete media with or without Tofacitinib (25μM) or Ruxolitinib (5μM), and then directly stimulated or rested in cytokine-free media for additional 6 h. Cells in every of the mentioned conditions were either left untreated or stimulated with IFN-β for 30 min (A) or with IL-10 (40 ng/ml) or IL-6 (40 ng/ml) for 20 min (B). Representative histograms show the levels of P-STAT-1 (A) or P-STAT3 (B) after stimulation in CD4<sup>+</sup> T cell subpopulations (Tnaive: CD4<sup>+</sup>CD44<sup>low</sup>Foxp3<sup>-</sup>, Tmem: CD4<sup>+</sup>CD44<sup>hi</sup>Foxp3<sup>-</sup> and Treg: CD4<sup>+</sup>Foxp3<sup>+</sup>) after stimulation in the different conditions. Results are representative of n=3 independent experiments.



## Figure Supplementary 4.

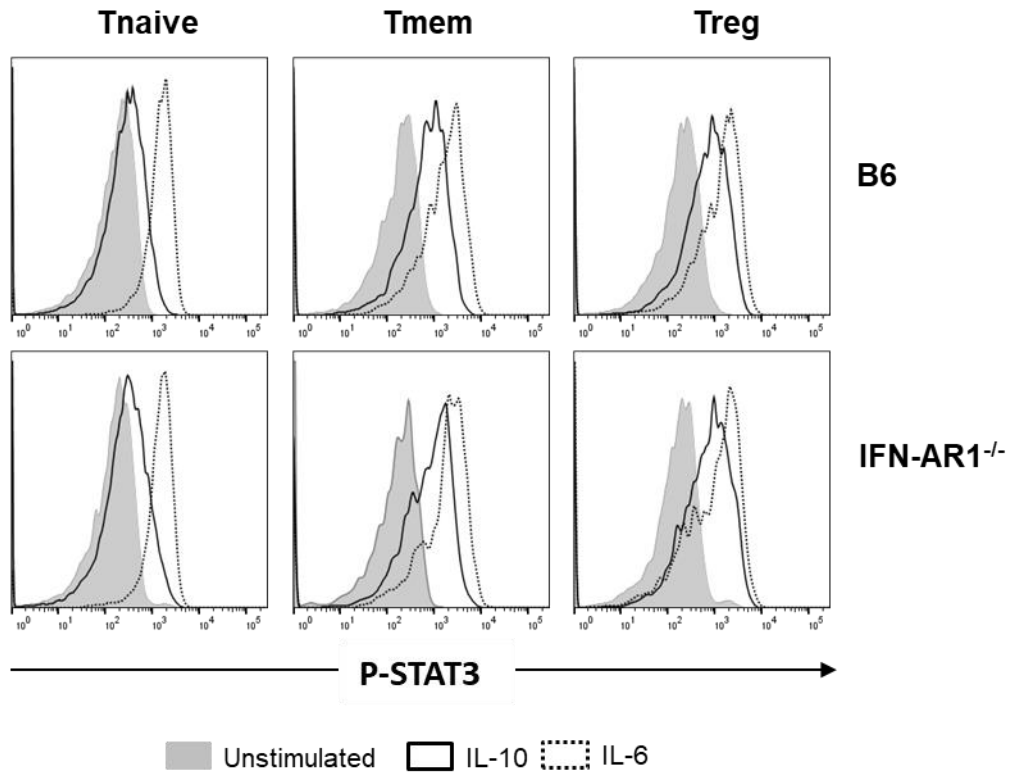

**Figure Supplementary 4. Response of IFN-AR1<sup>-/-</sup> T cells to IL-10 stimulation.** Freshly purified T cells from C57BL/6 and IFN-AR1<sup>-/-</sup> mice were either left untreated or stimulated with IL10 (40 ng/ml) or IL-6 (40 ng/ml) for 20'. The levels of P-STAT3 after stimulation in CD4 T cell subpopulations were measured by phosphor-flow. Representative histograms show P-STAT3 levels in Tnaive: CD4<sup>+</sup>CD44<sup>low</sup>Foxp3<sup>-</sup>, Tmem: CD4<sup>+</sup>CD44<sup>hi</sup>Foxp3<sup>-</sup> and Treg: CD4<sup>+</sup>Foxp3<sup>+</sup> cells after stimulation in both cell types. Results are representative of n=3 independent experiments.

## Supplementary Tables

**Table Supplementary 1. Sequence of primers used in RT-PCT studies**

| Gene Target            | Direction | Sequence (5' → 3')      | Source                             |
|------------------------|-----------|-------------------------|------------------------------------|
| <b>Tnfsf14 (LIGHT)</b> | Forward   | TCTCTAGGAAAGCCCAGATCG   | Harvard Primer Bank ID: 9507195a1  |
|                        | Reverse   | GTCCACACCAGGAGTGAGC     |                                    |
| <b>Sphk1</b>           | Forward   | AAAATACTGAGAAACTCGGTCGG | Harvard Primer Bank ID: 3659692a1  |
|                        | Reverse   | GCATCGCTTCTTAAAGTCCAGA  |                                    |
| <b>CD244 (2B4)</b>     | Forward   | CTCGGGGCCATCATTGTTC     | Harvard Primer Bank ID: 3551962a1  |
|                        | Reverse   | GCTAGAAGGGAGCTGAACATCA  |                                    |
| <b>Tarm1</b>           | Forward   | TCTAGGCTCCTTCCCTTCTC    | Harvard Primer Bank ID: 28893513a1 |
|                        | Reverse   | GGGGTGGGGCTCTTACATT     |                                    |
| <b>SOCS1</b>           | Forward   | GACACTCACTCCGCACCTT     | Ref below (1)                      |
|                        | Reverse   | GAAGCAGTTCGGTTGGCGACT   |                                    |
| <b>SOCS3</b>           | Forward   | ATGGTCACCCACAGCAAGTTT   | Harvard Primer Bank ID: 6671758a1  |
|                        | Reverse   | TCCAGTAGAATCCGCTCTCCT   |                                    |
| <b>GAPDH</b>           | Forward   | GGGAAGCCCATCACCATCT     | Ref below (2)                      |
|                        | Reverse   | CGACATACTCAGACCGGC      |                                    |

Appropriate primer sequence was obtained from <http://pga.mgh.harvard.edu/primerbank/>

(1) Collins, EL et al. J Immunol. 2011 Sep 1; 187(5): 2666–2676.

(2) Revert, F et al. Am J Pathol. 2007 Nov; 171(5): 1419–1430.

All genes were amplified using the same amplification program that consisted of: one cycle at 95°C for 15 min followed by forty five cycles at 94°C for 15 s, 60°C for 30 s and 72°C for 30 s; and concluding with a dissociation stage. The threshold for detection was set within the linear phase of the logarithmic amplification plot.
